# Supplementary material for: Dual Antitubercular and Antileishmanial Profiles of Quinoxaline Di-N-Oxides Containing an Amino Acidic Side Chain
Source: MDPI journal article supplement (doi:10.3390/ph17040487), 2024-04-11

## *Supporting Information*

### **Dual antitubercular and anti-leishmanial profiles of quinoxaline di-*N*-oxides containing an amino acidic side chain**

Juan F. González,<sup>a</sup> María-Auxiliadora Dea-Ayuela<sup>b</sup>, Lena Huck,<sup>a</sup> José María Orduña,<sup>a</sup> Francisco Bolás-Fernández,<sup>c</sup> Elena de la Cuesta,<sup>a</sup> Nazia Haseen,<sup>d</sup> Ashraf Ali Mohammed,<sup>d</sup> J. Carlos Menéndez<sup>a\*</sup>

<sup>a</sup> Unidad de Química Orgánica y Farmacéutica, Departamento de Química en Ciencias Farmacéuticas, Facultad de Farmacia, Universidad Complutense, Plaza de Ramón y Cajal s/n, 28040 Madrid, Spain

<sup>b</sup> Departamento de Farmacia, Facultad de Ciencias de la Salud, Universidad Cardenal Herrera-CEU, CEU Universities, C/ Santiago Ramón y Cajal, Alfara del Patriarca, 46115 Valencia, Spain.

<sup>c</sup> Departamento de Microbiología y Parasitología, Facultad de Farmacia, Universidad Complutense de Madrid, Plaza Ramón y Cajal s/n, 28040 Madrid, Spain.

<sup>d</sup> AMIPRO SDN.BHD. Level 3, Bangunan Inkubator Universiti. Sains@USM, Lebuah Bukit Jambul, 11900 Bayan Lepas, Pulau Pinang, Malaysia.

Correspondence: J. C. Menéndez, josecm@ucm.es

### **Table of Contents**

|                                                              |    |
|--------------------------------------------------------------|----|
| 1. Numerical biological data.                                | S2 |
| 2. Copies of <sup>1</sup> H and <sup>13</sup> C NMR spectra. | S5 |

## 1. Numerical biological data

**Table S1.** Antibacterial activity against Mtb H37Rv \*

| Entry | Compound      | IC <sub>50</sub> (μM) | IC <sub>90</sub> (μM) | MIC (μM) |
|-------|---------------|-----------------------|-----------------------|----------|
| 1     | <b>4a</b>     | 26.30                 | 55.50                 | 100      |
| 2     | <b>4b</b>     | 40.64                 | 69.83                 | 100      |
| 3     | <b>4c</b>     | 13.19                 | 25.90                 | 50       |
| 4     | <b>4d</b>     | 28.57                 | 47.72                 | 50       |
| 5     | <b>4e</b>     | 25.17                 | 47.86                 | 100      |
| 6     | <b>4f</b>     | 21.91                 | 47.93                 | 50       |
| 7     | <b>4g</b>     | 49.95                 | 71.87                 | 100      |
| 8     | <b>4h</b>     | 8.46                  | 12.42                 | 50       |
| 9     | <b>4i</b>     | 47.2                  | 66.5                  | 100      |
| 10    | <b>4j</b>     | 12.87                 | 24.60                 | 50       |
| 11    | <b>4k</b>     | 25.87                 | 44.60                 | 100      |
| 12    | <b>4l</b>     | 7.20                  | 15.5                  | 50       |
| 13    | <b>4m</b>     | 18.28                 | 36.50                 | 50       |
| 14    | <b>4n</b>     | 11.91                 | 27.93                 | 50       |
| 15    | <b>5f</b>     | 4.28                  | 9.86                  | 25       |
| 16    | <b>5h</b>     | 16.38                 | 21.97                 | 50       |
| 17    | <b>5m</b>     | 17.20                 | 3505                  | 50       |
| 18    | <b>6</b>      | 44.95                 | 76.38                 | 100      |
| 19    | <b>7</b>      | 28.28                 | 66.50                 | 100      |
| 20    | Amikacin      | 0.07                  | 0.08                  | 0.16     |
| 21    | Cycloserine   | 12.47                 | 13.49                 | 25       |
| 22    | Ethambutol    | 1.56                  | 32.79                 | 12.5     |
| 23    | Isoniazid     | 0.18                  | 0.29                  | 0.31     |
| 24    | Pyrimethamine | 37.35                 | 74.96                 | 100      |

\* None of the compounds showed cytotoxicity in Vero cells at concentrations up to 6.25 μg/mL.

**Table S2.** Antileishmanial promastigote activity, cytotoxicity and selectivity indexes\*

| Entry | Compound    | <i>L. amazonensis</i><br>IC <sub>50</sub> , $\mu$ M (SI) | <i>L. donovani</i><br>IC <sub>50</sub> , $\mu$ M (SI) | Toxicity against J774<br>macrophages CC <sub>50</sub> , $\mu$ M |
|-------|-------------|----------------------------------------------------------|-------------------------------------------------------|-----------------------------------------------------------------|
| 1     | <b>4a</b>   | 171.0 $\pm$ 8.5 (5.0)                                    | 103.4 $\pm$ 9.8 (8.2)                                 | 849.8                                                           |
| 2     | <b>4b</b>   | 157.4 $\pm$ 7.8 (9.9)                                    | 261.1 $\pm$ 7.8 (6.0)                                 | 1566.6                                                          |
| 3     | <b>4c</b>   | > 237.5 (> 30)                                           | > 237.5 (> 30)                                        | 6960.1                                                          |
| 4     | <b>4d</b>   | 124.9 $\pm$ 1.43 (4.3)                                   | 164.9 $\pm$ 10.24 (3.3)                               | 539.1                                                           |
| 5     | <b>4e</b>   | 25.1 $\pm$ 0.56 (0.7)                                    | 34.0 $\pm$ 5.2 (0.5)                                  | 18.5 $\pm$ 3.4                                                  |
| 6     | <b>4f</b>   | > 261.1 (> 30.0)                                         | > 261.1 (30.0)                                        | 7832.9                                                          |
| 7     | <b>4g</b>   | 111.8 $\pm$ 13.7 (64.3)                                  | 40.0 $\pm$ 6.7 (179.9)                                | 7194.2                                                          |
| 8     | <b>4h</b>   | 122.0 $\pm$ 9.9 (4.5)                                    | 25.3 $\pm$ 1.55 (21.9)                                | 554.3                                                           |
| 9     | <b>4i</b>   | 116.9 $\pm$ 8.0 (3.2)                                    | 46.9 $\pm$ 14.2 (12.2)                                | 379.0 $\pm$ 49.9                                                |
| 10    | <b>4j</b>   | 110.8 $\pm$ 4.0 (2.9)                                    | 13.8 $\pm$ 9.5 (23.2)                                 | 318.6 $\pm$ 0.84                                                |
| 11    | <b>4k</b>   | 117.4 $\pm$ 14.3 (2.8)                                   | 23.9 $\pm$ 2.2 (13.8)                                 | 330.0 $\pm$ 75.5                                                |
| 12    | <b>4l</b>   | > 229.9 (> 6.0)                                          | 229.9 (> 6.0)                                         | 1380                                                            |
| 13    | <b>4m</b>   | 62.8 $\pm$ 1.6 (7.2)                                     | 84.8 $\pm$ 8.9 (5.4)                                  | 454.5                                                           |
| 14    | <b>4n</b>   | 97.3 $\pm$ 4.3 (2.0)                                     | 43.5 $\pm$ 1.1 (4.4)                                  | 191.3 $\pm$ 29.3                                                |
| 15    | <b>5d</b>   | > 280.1 (> 3.0)                                          | > 280.1 (> 3.0)                                       | 840                                                             |
| 16    | <b>5f</b>   | > 271.0 (> 30)                                           | > 271.0 (> 30)                                        | 8130                                                            |
| 17    | <b>5h</b>   | > 228.8 (> 8)                                            | > 228.8 (> 8)                                         | 1831                                                            |
| 18    | <b>5m</b>   | > 269.5 (> 30)                                           | > 269.5 (> 30)                                        | 8086                                                            |
| 19    | <b>6</b>    | 20.5 $\pm$ 2.5 (20.7)                                    | 6.2 $\pm$ 0.2 (68.4)                                  | 424.0                                                           |
| 20    | Miltefosine | 47.9 $\pm$ 4.9 (2.8)                                     | 0.2 $\pm$ 0.02 (680.5)                                | 136.1 $\pm$ 10.3                                                |

\* SI, selectivity index.

**Table S3.** Anti-amastigote activity, cytotoxicity and selectivity of selected compounds\*

| Entry | Compound    | <i>L. amazonensis</i><br>IC <sub>50</sub> , $\mu$ M (SI) | <i>L. donovani</i><br>IC <sub>50</sub> , $\mu$ M (SI) | Toxicity against J774<br>macrophages CC <sub>50</sub> , $\mu$ M |
|-------|-------------|----------------------------------------------------------|-------------------------------------------------------|-----------------------------------------------------------------|
| 1     | <b>4a</b>   | 12.6 $\pm$ 0.3 (67.3)                                    | ND                                                    | 850                                                             |
| 2     | <b>4d</b>   | 9.8 $\pm$ 1.0 (54.9)                                     | 234.2 $\pm$ 5.9 (2.3)                                 | 539                                                             |
| 3     | <b>4g</b>   | 23.2 $\pm$ 4.1 (310.6)                                   | 77.5 $\pm$ 6.2 (92.8)                                 | 7194                                                            |
| 4     | <b>4h</b>   | 20.9 $\pm$ 4.0 (26.5)                                    | 39.5 $\pm$ 7.5 (14.0)                                 | 554                                                             |
| 5     | <b>4i</b>   | 12.9 $\pm$ 1.7 (29.9)                                    | 71.0 $\pm$ 11.0 (5.3)                                 | 379                                                             |
| 6     | <b>4k</b>   | 7.2 $\pm$ 0.5 (45.6)                                     | 72.2 $\pm$ 18.6 (4.6)                                 | 330                                                             |
| 7     | <b>4m</b>   | 74.4 $\pm$ 19.3 (6.11)                                   | 284.9 $\pm$ 114.8 (1.6)                               | 454                                                             |
| 8     | <b>6</b>    | 31.9 $\pm$ 13.2 (13.3)                                   | ND                                                    | 424                                                             |
| 9     | Miltefosine | 47.6 $\pm$ 7.4 (2.9)                                     | 7.1 (19.1)                                            | 136                                                             |

\* SI, selectivity index.

## 2. Copies of $^1\text{H}$ and $^{13}\text{C}$ NMR Spectra

### Compound 1a

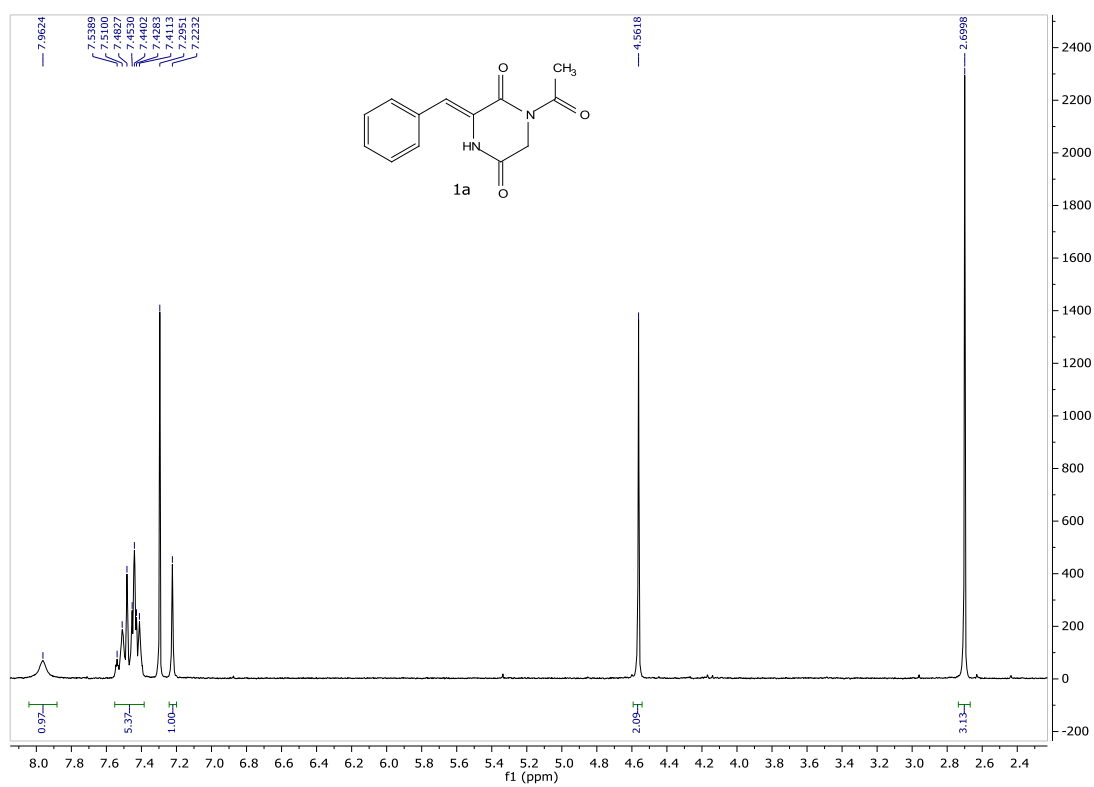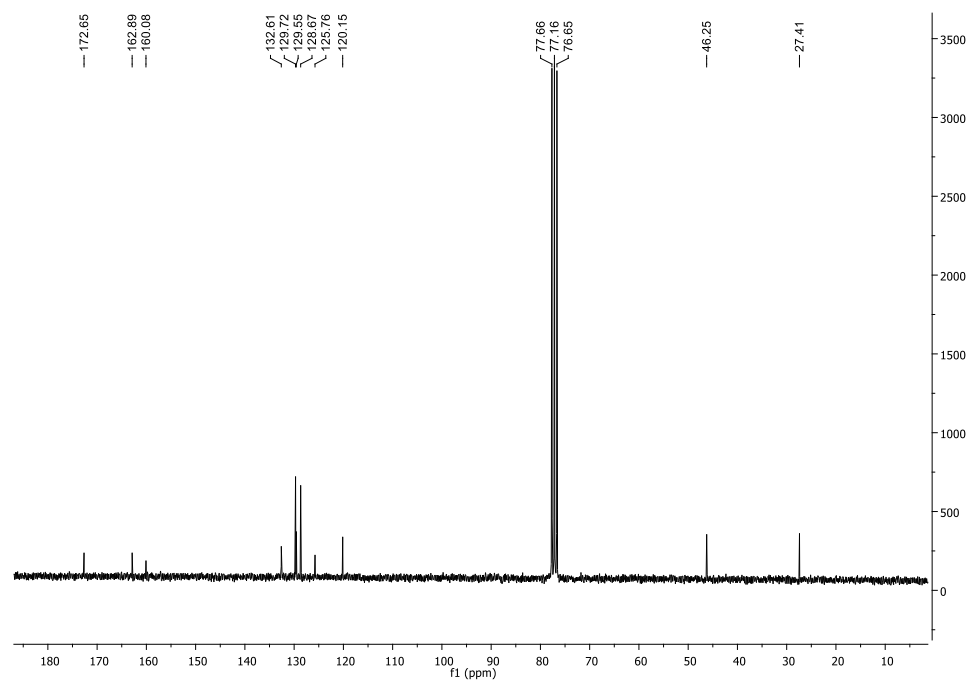

# Compound 1b

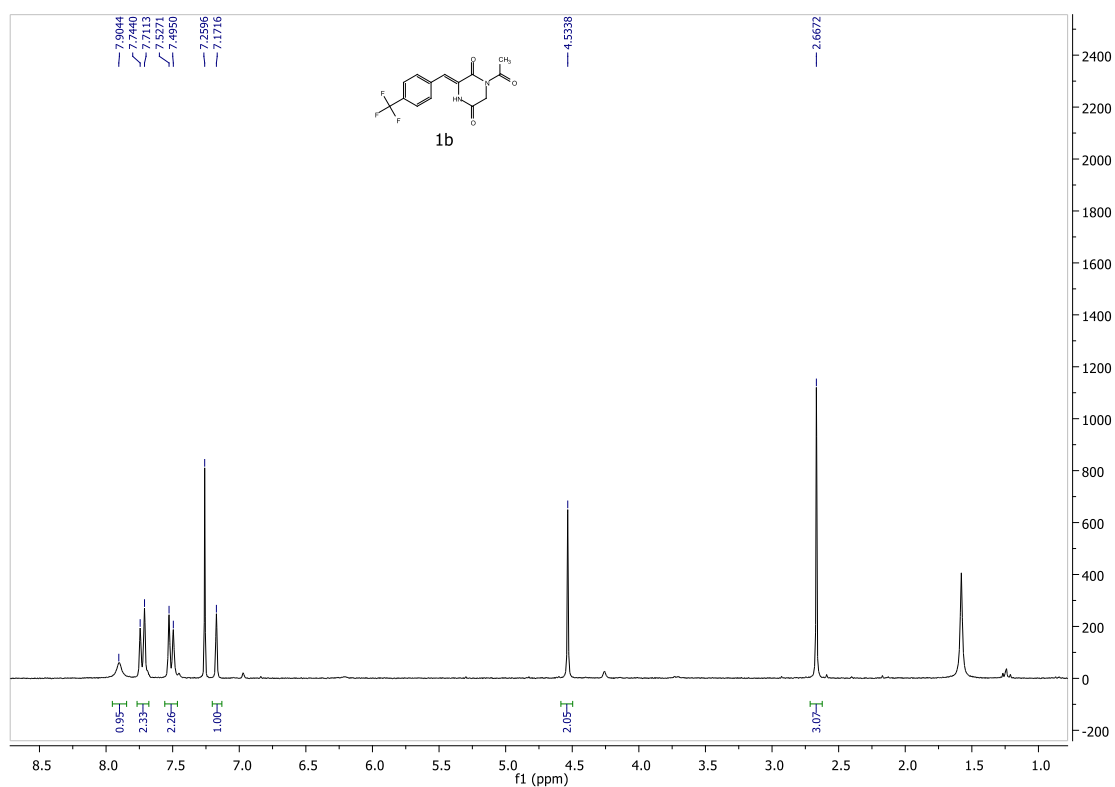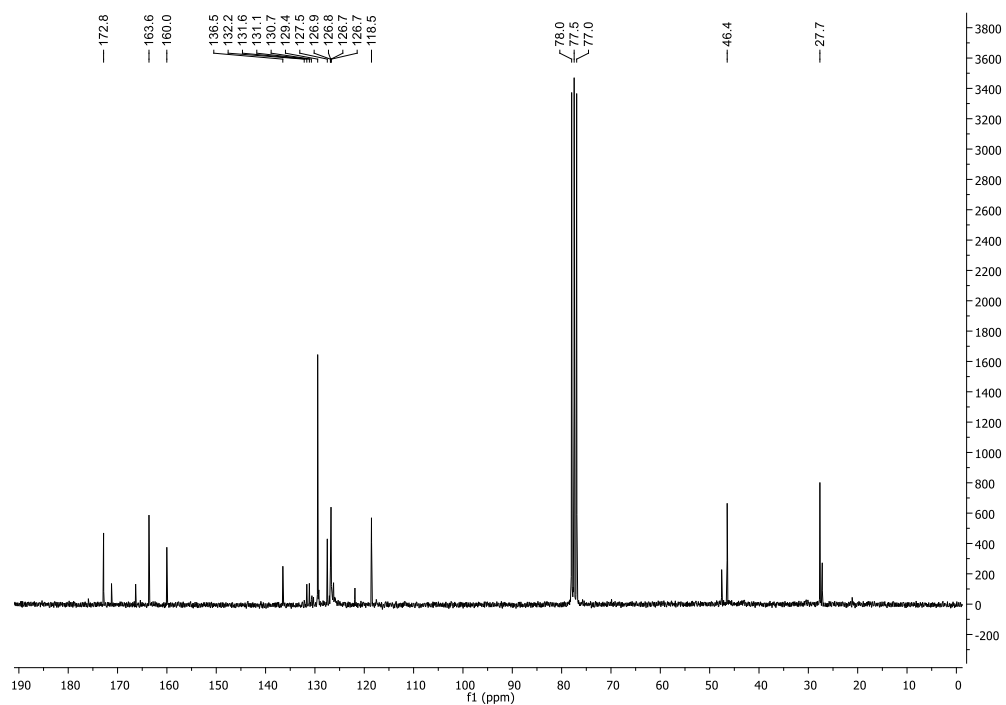

# Compound 1c

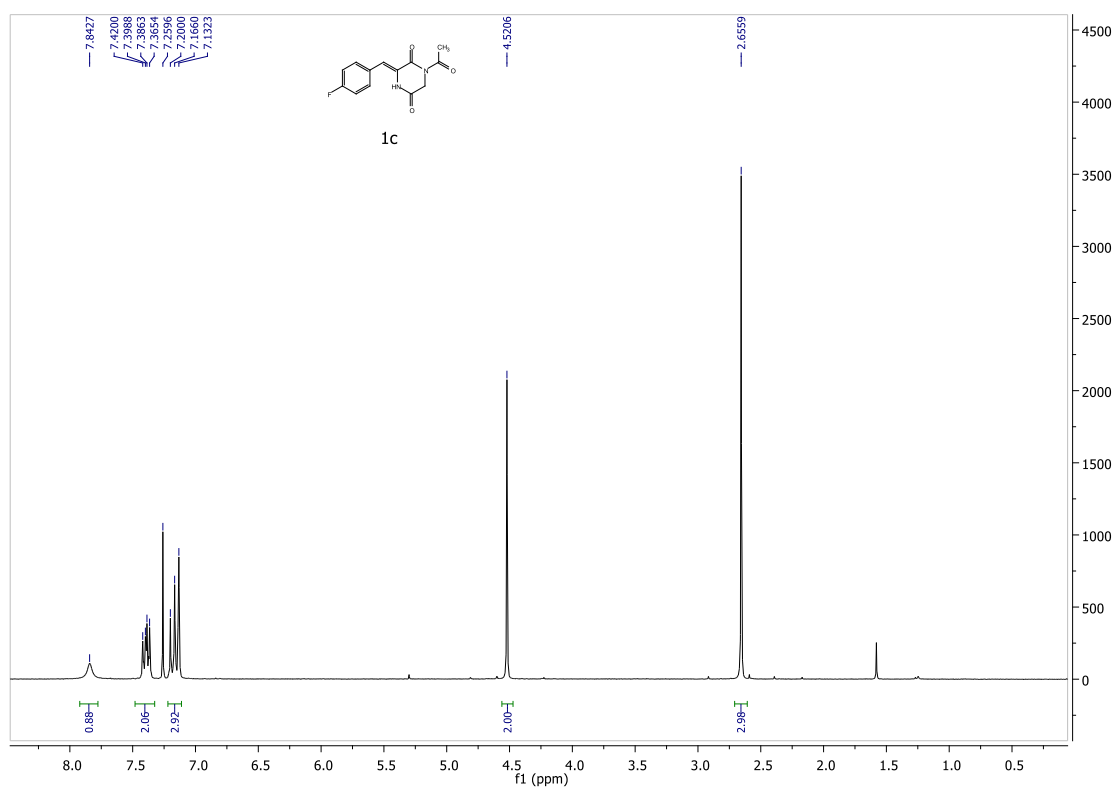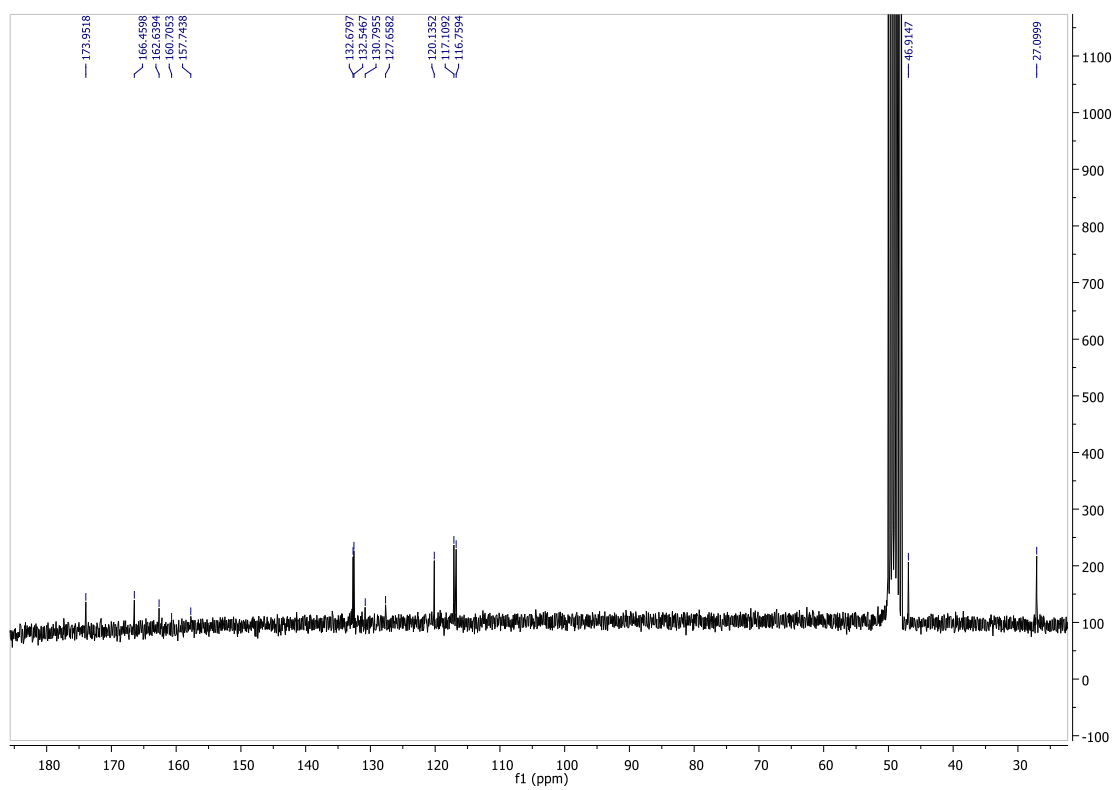

## Compound 1d

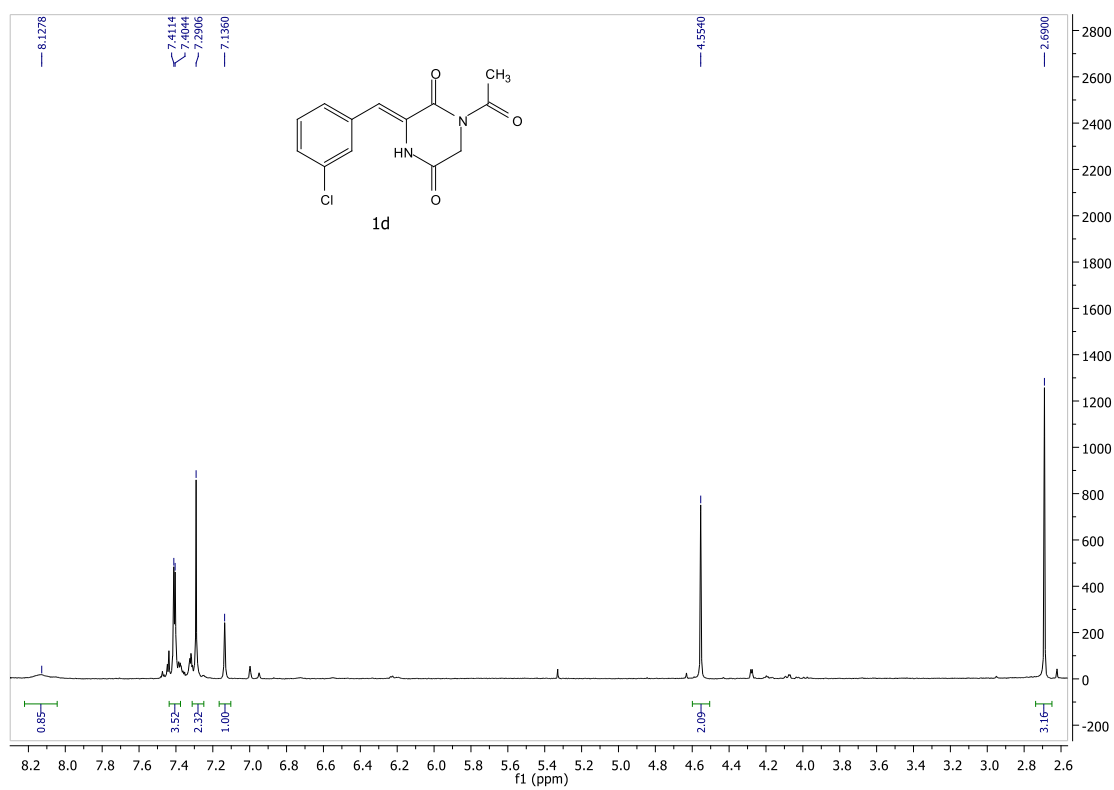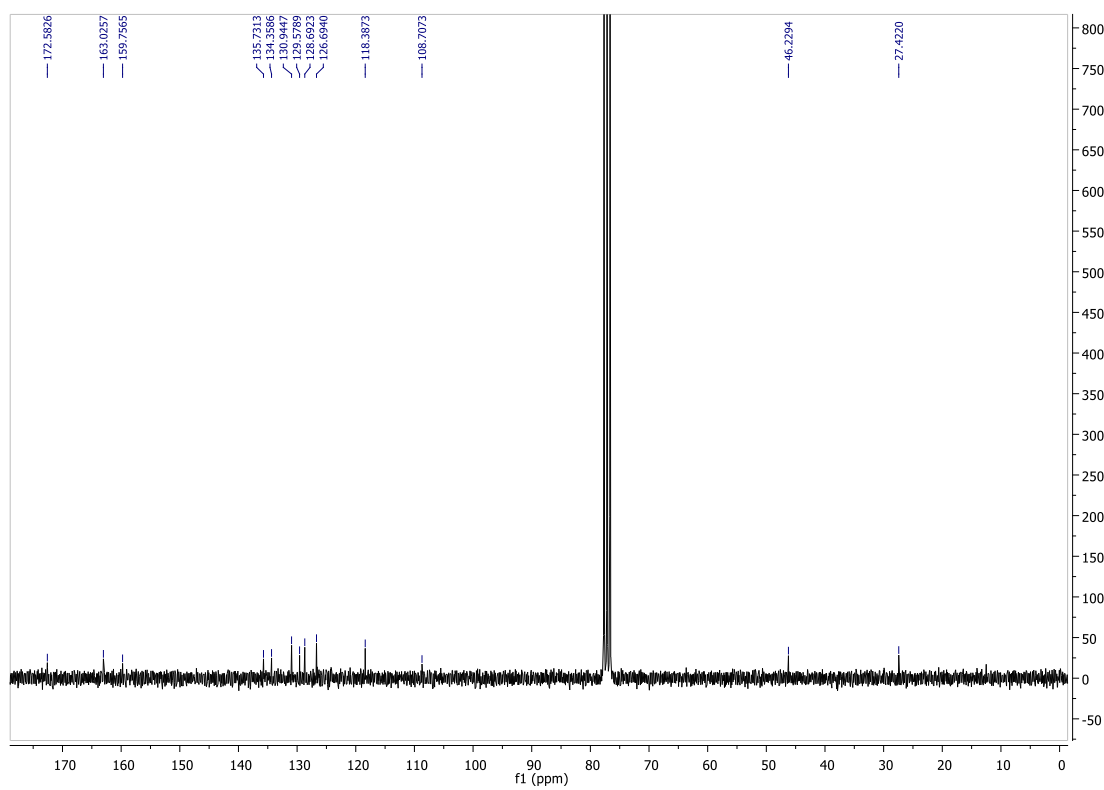



# Compound 1e

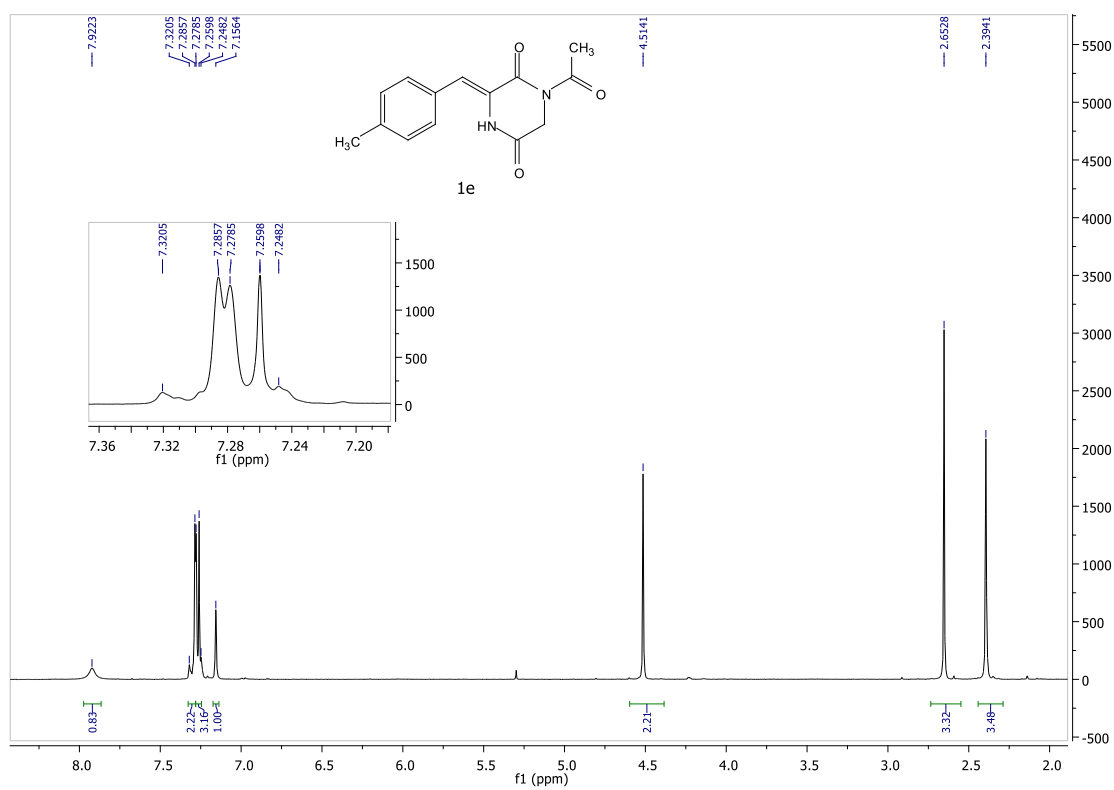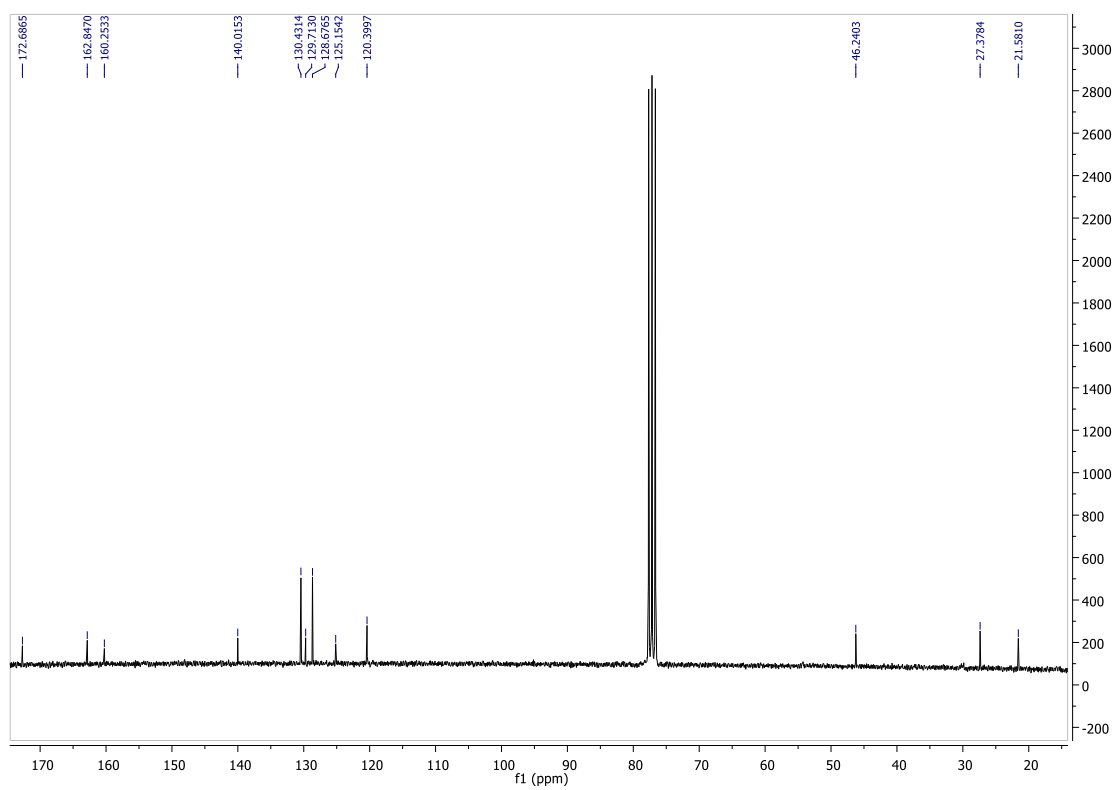

# Compound 1f

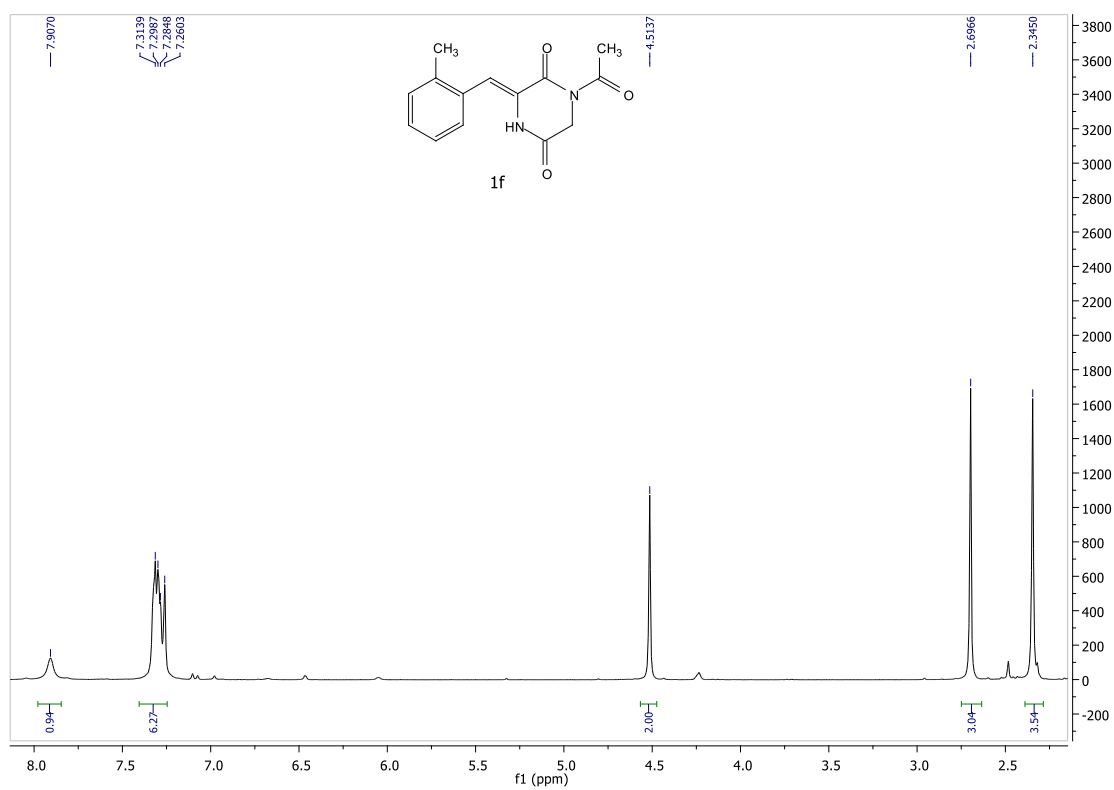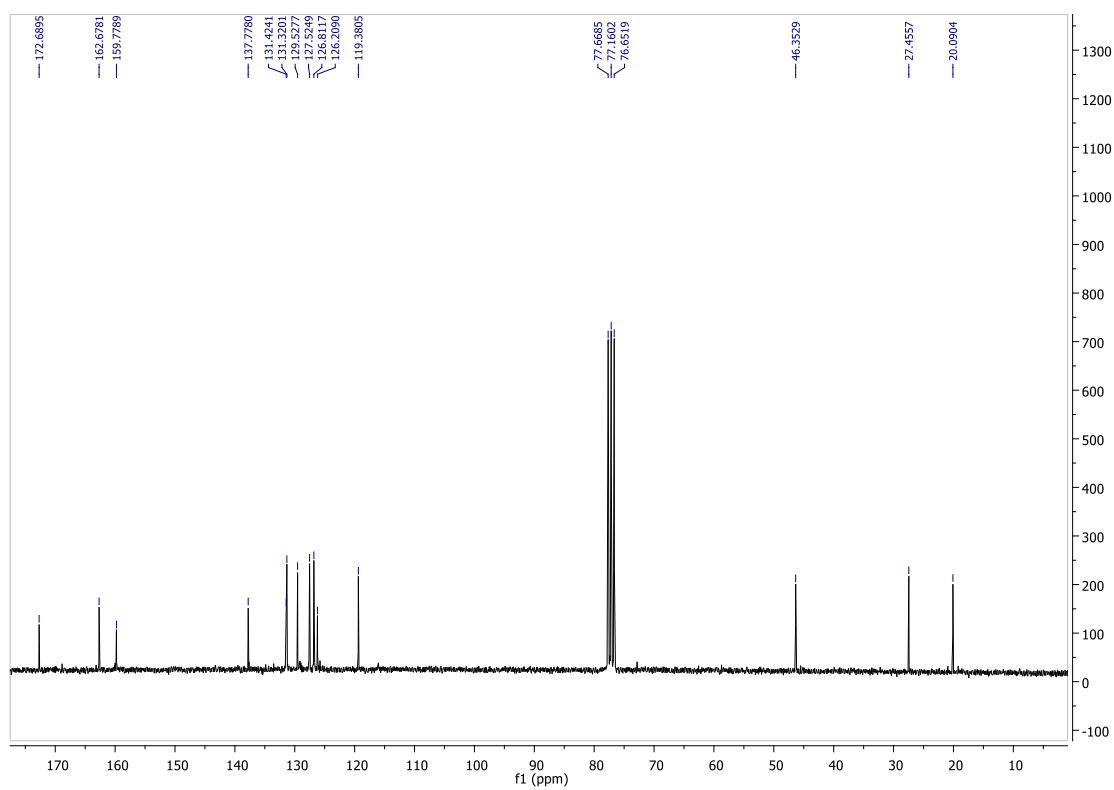

# Compound 1g

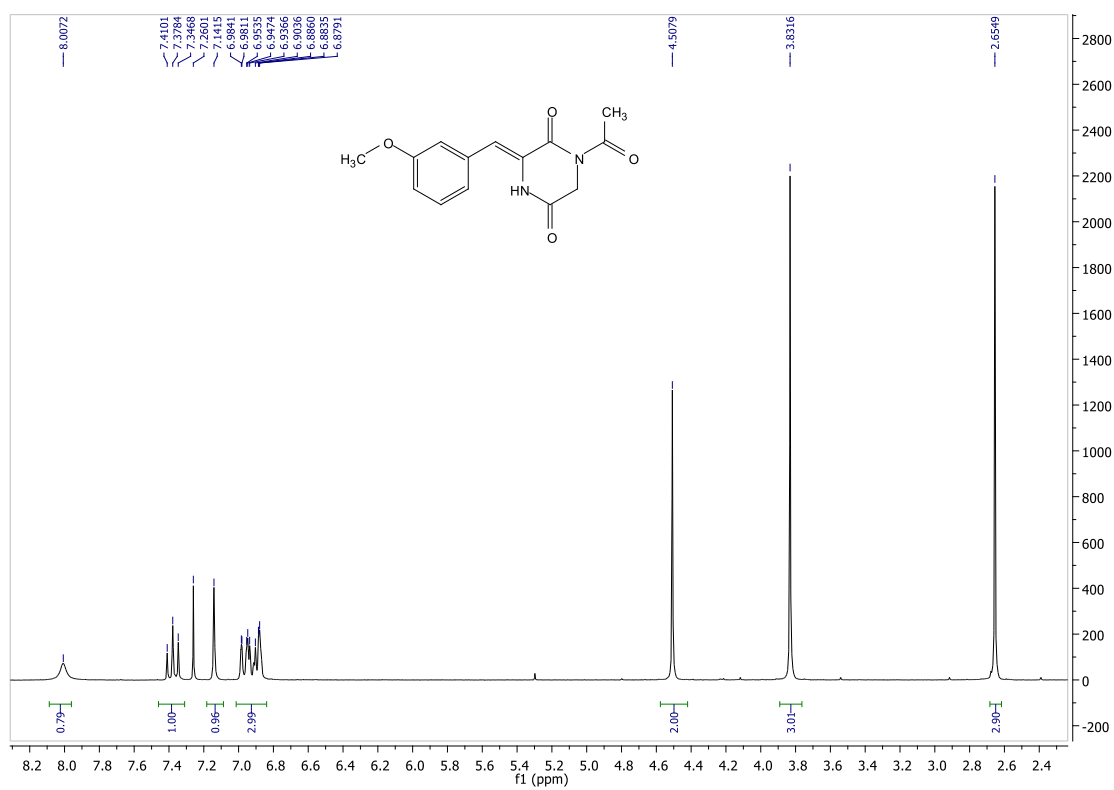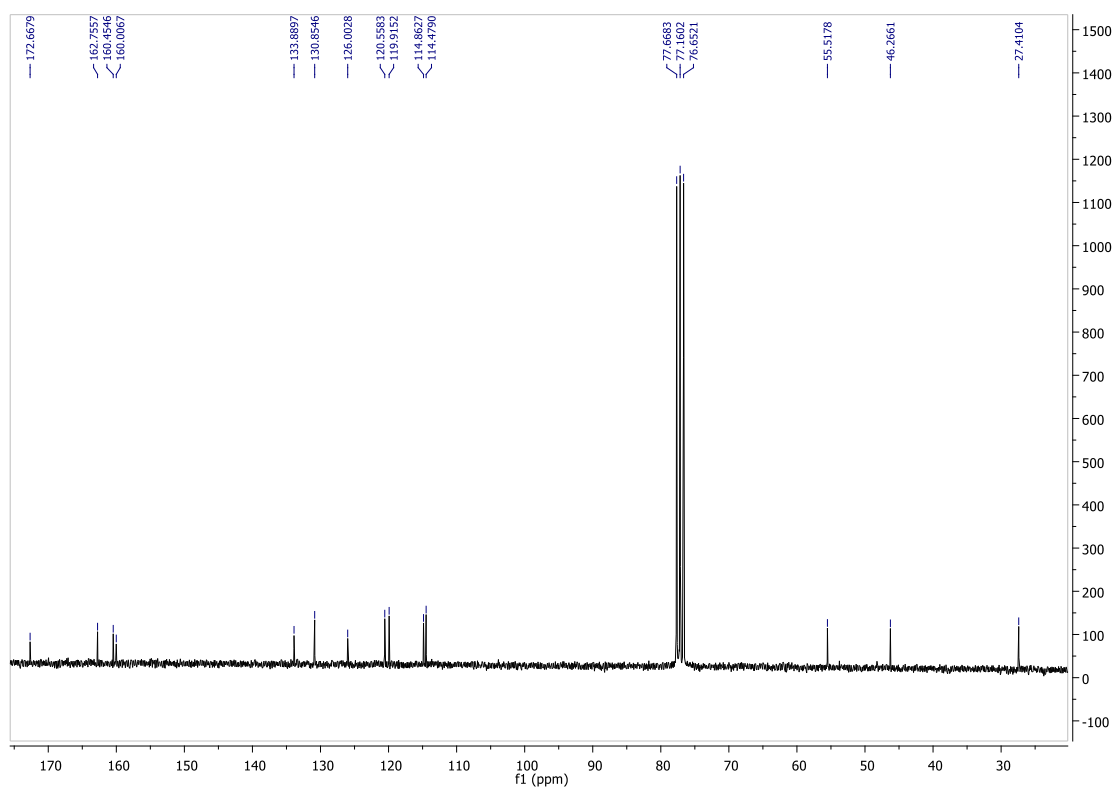

# Compound 1h

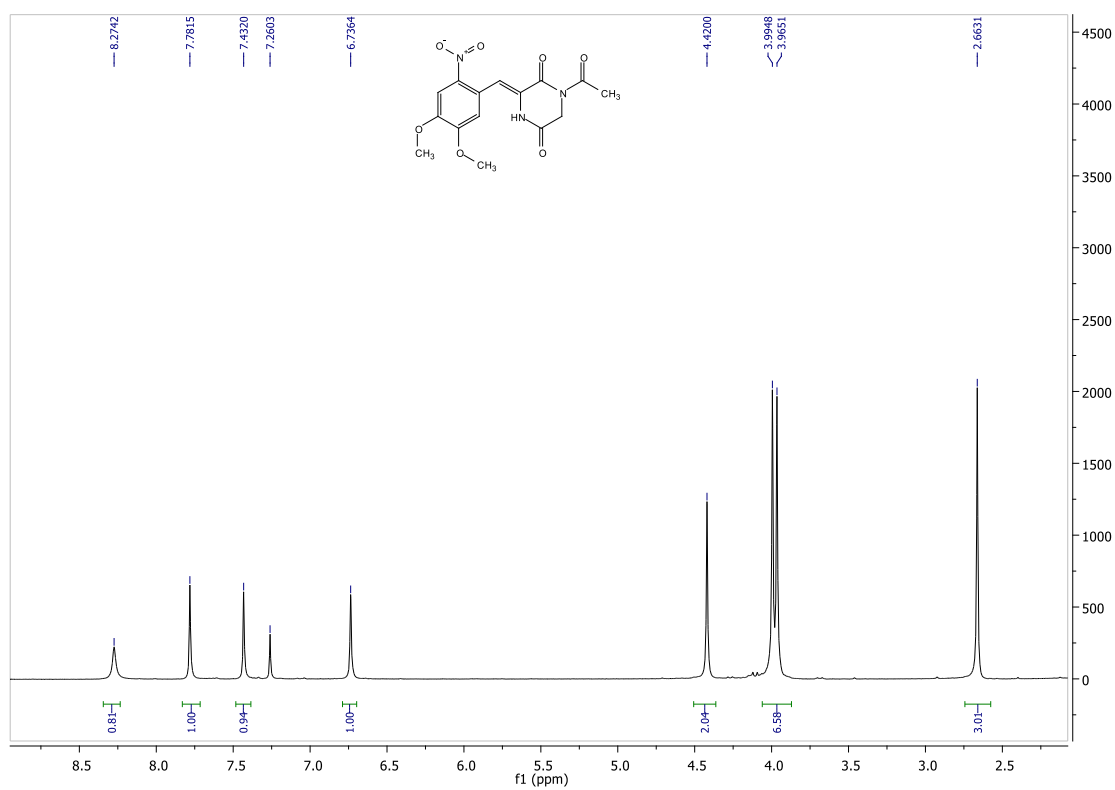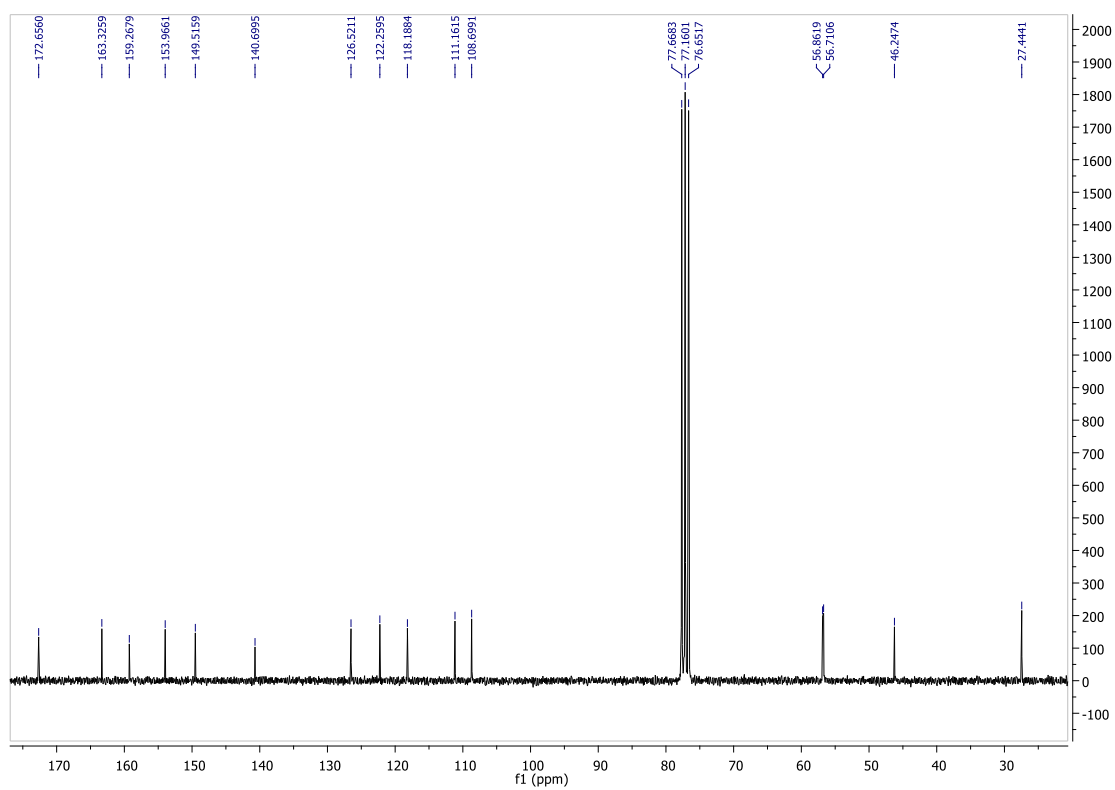

# Compound 2a

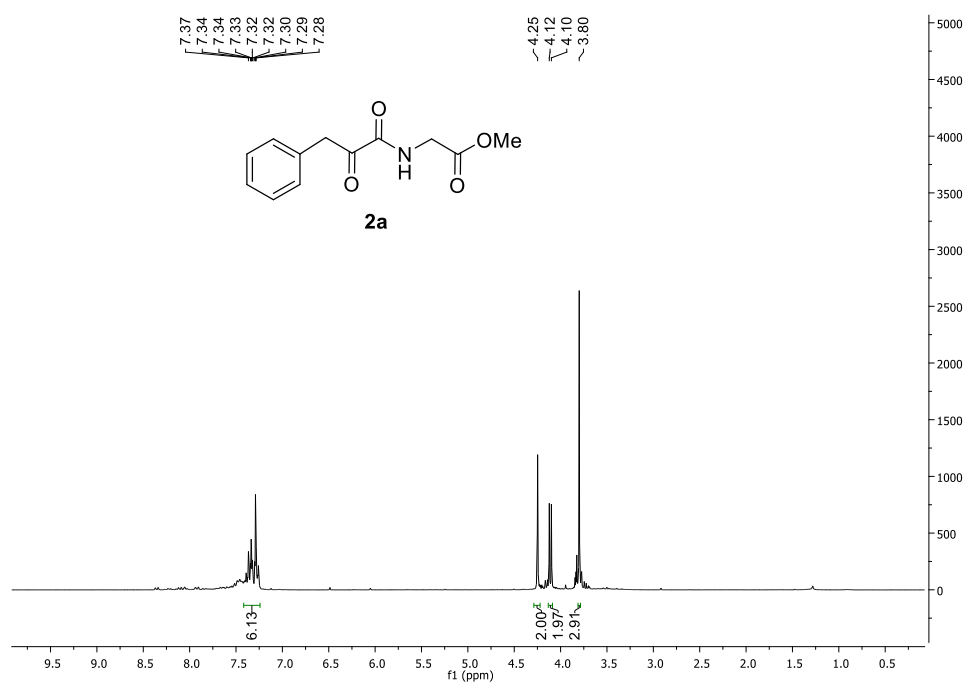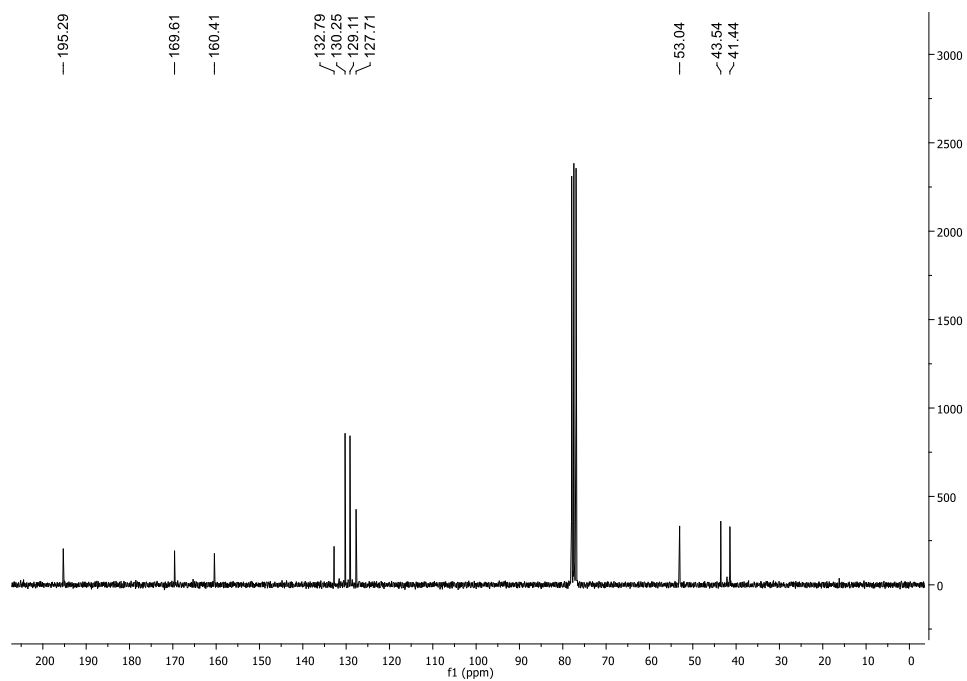

## Compound 2b

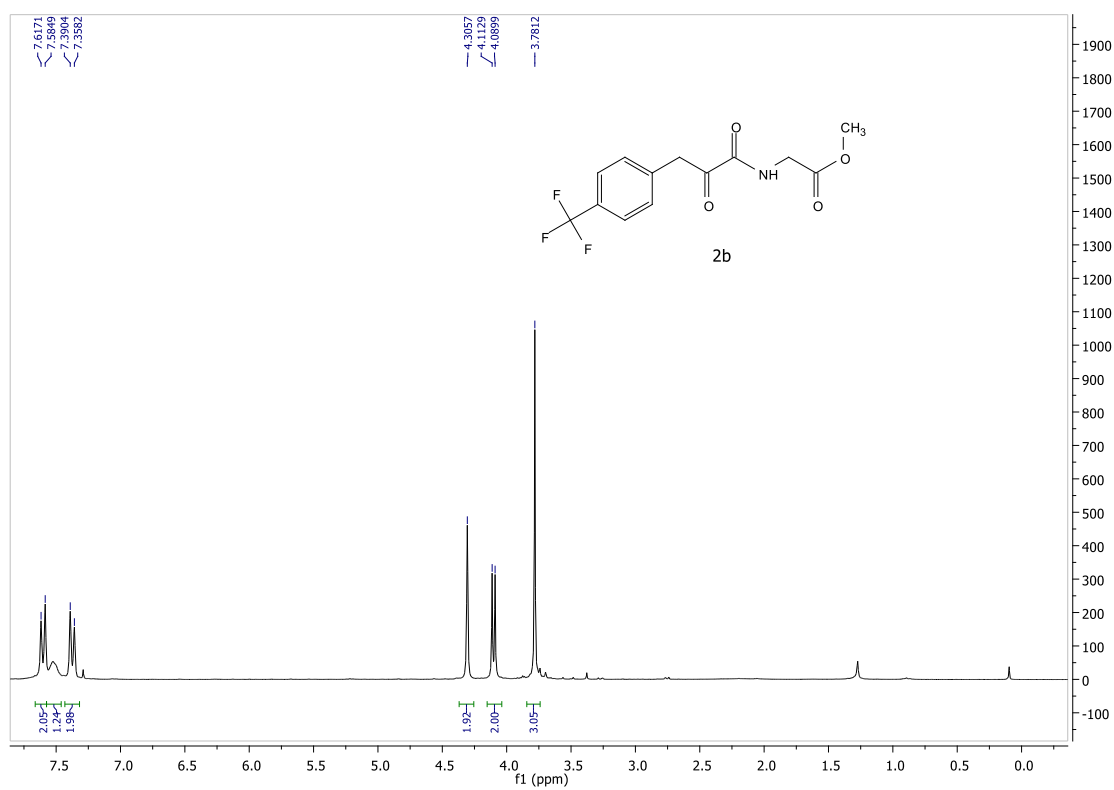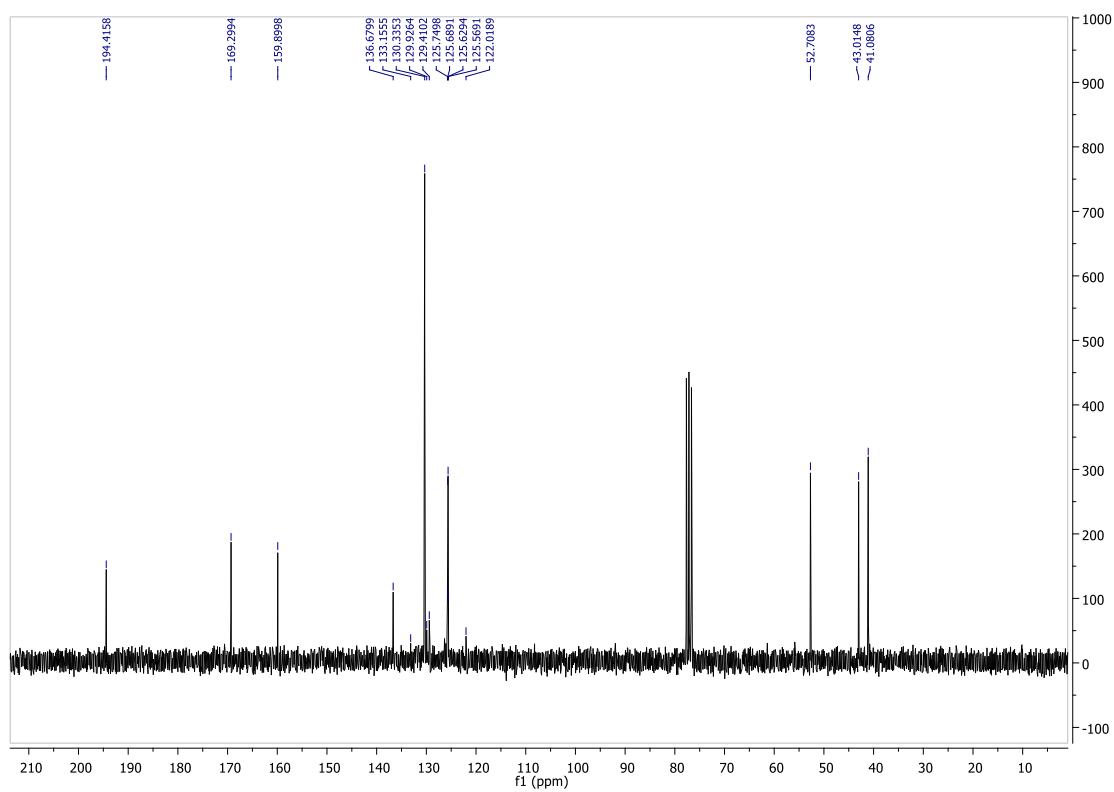

# Compound 2c

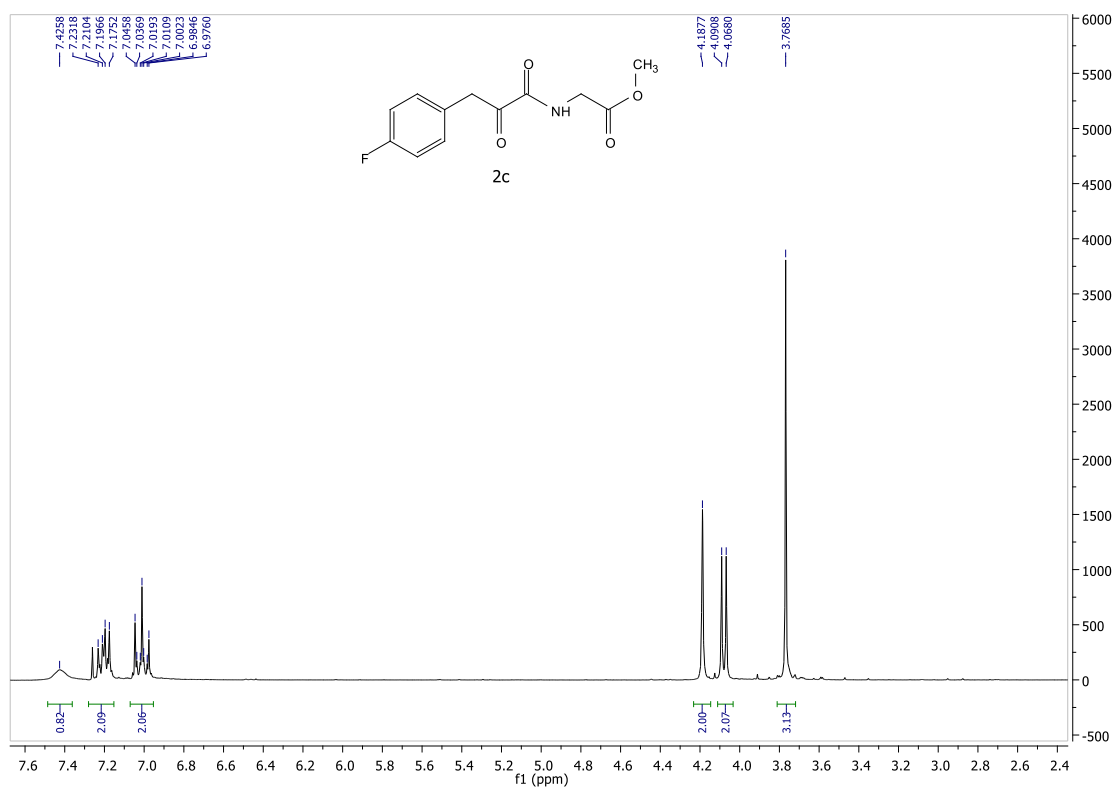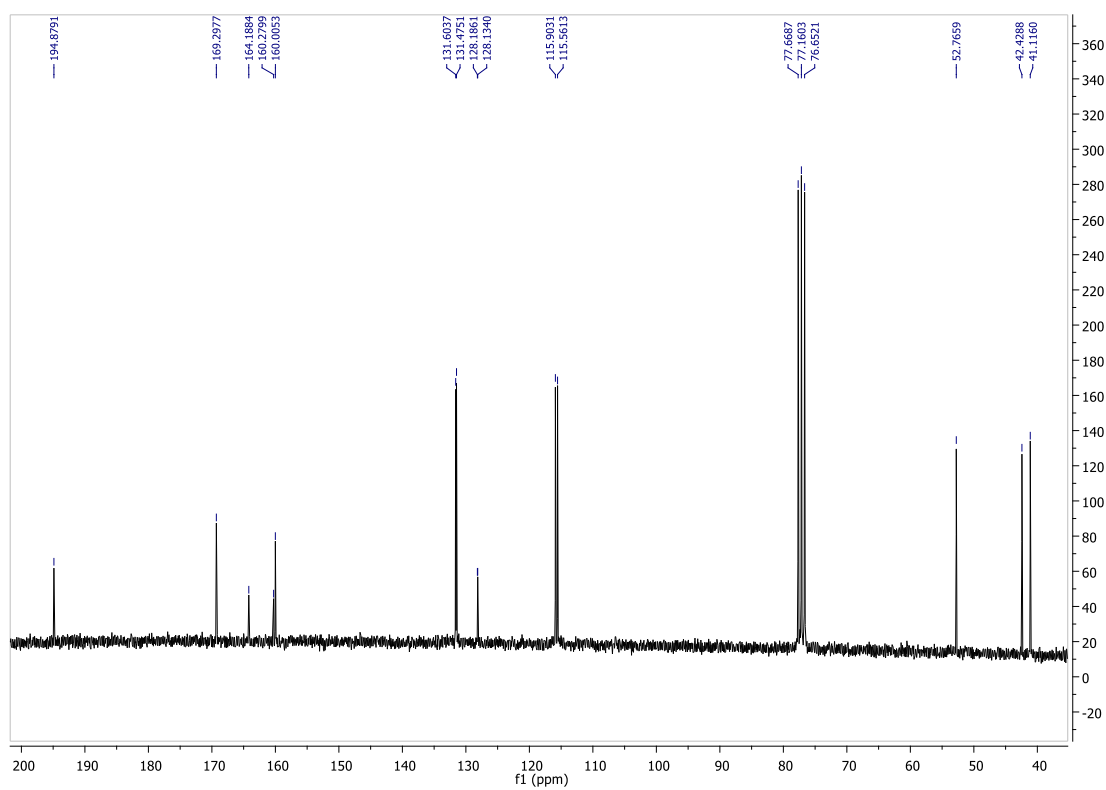

# Compound 2d

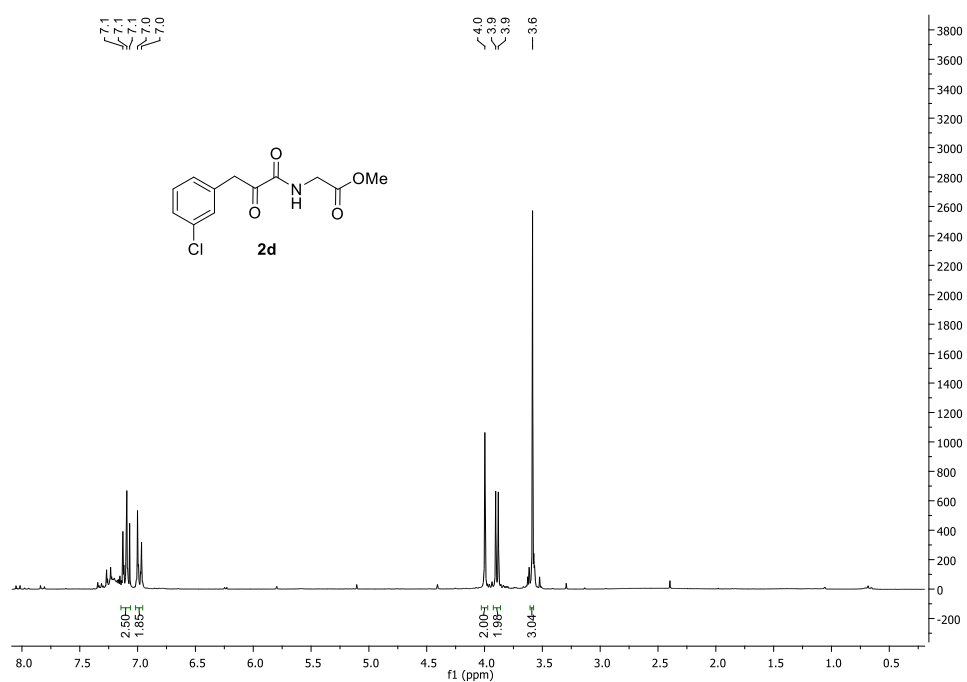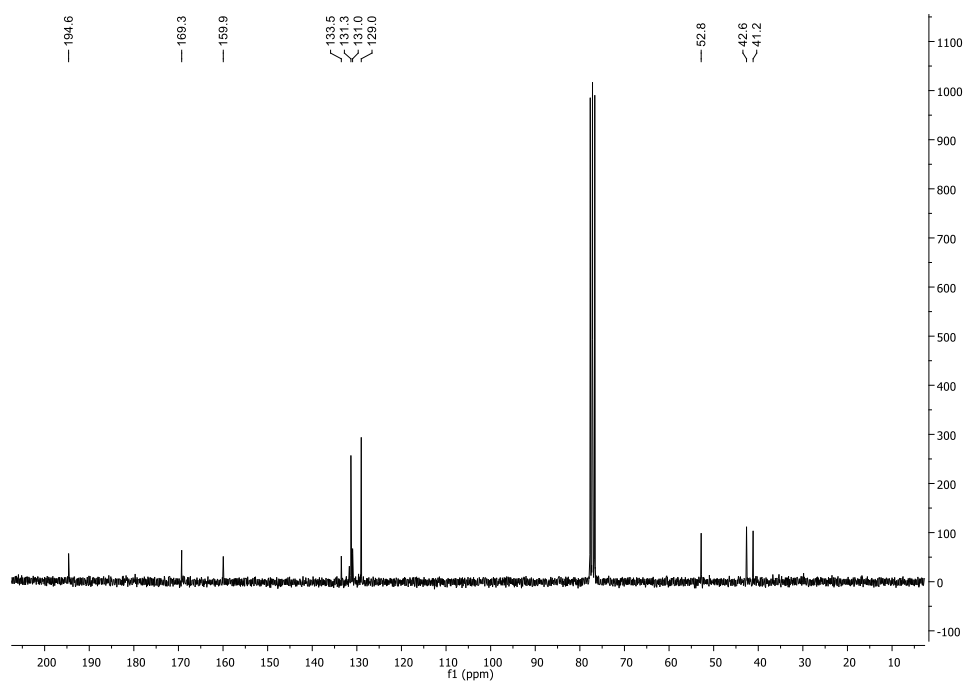



## Compound 2e

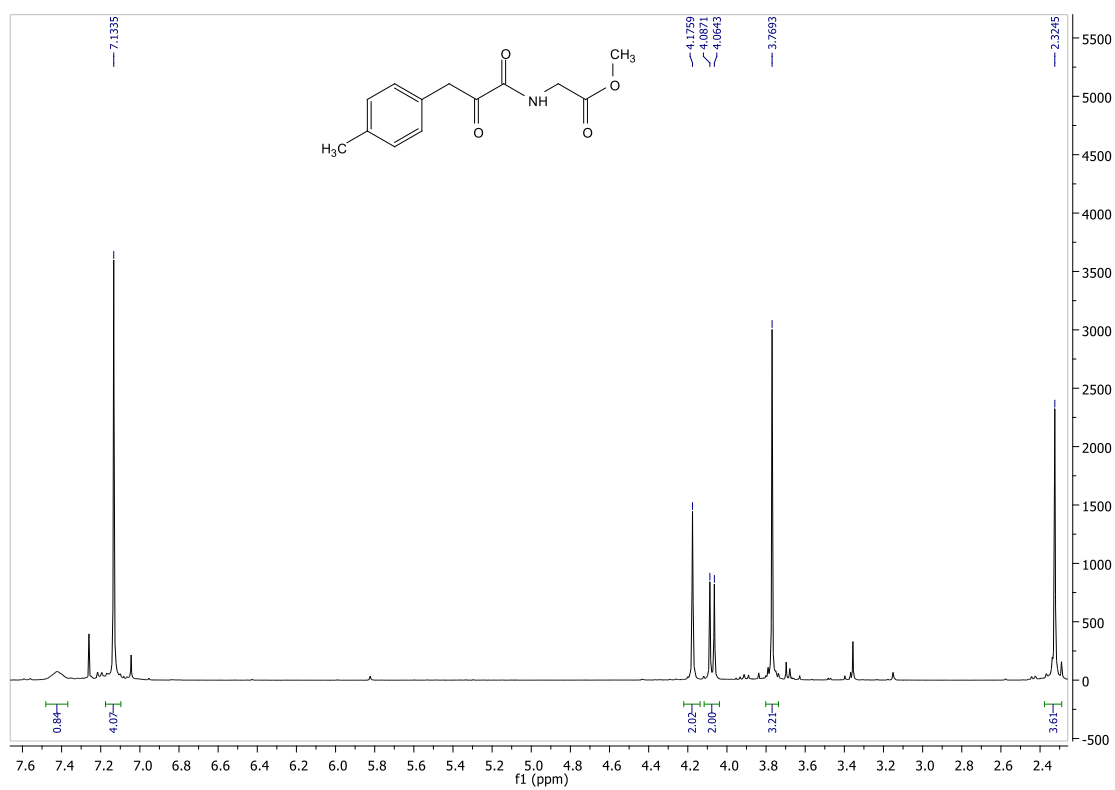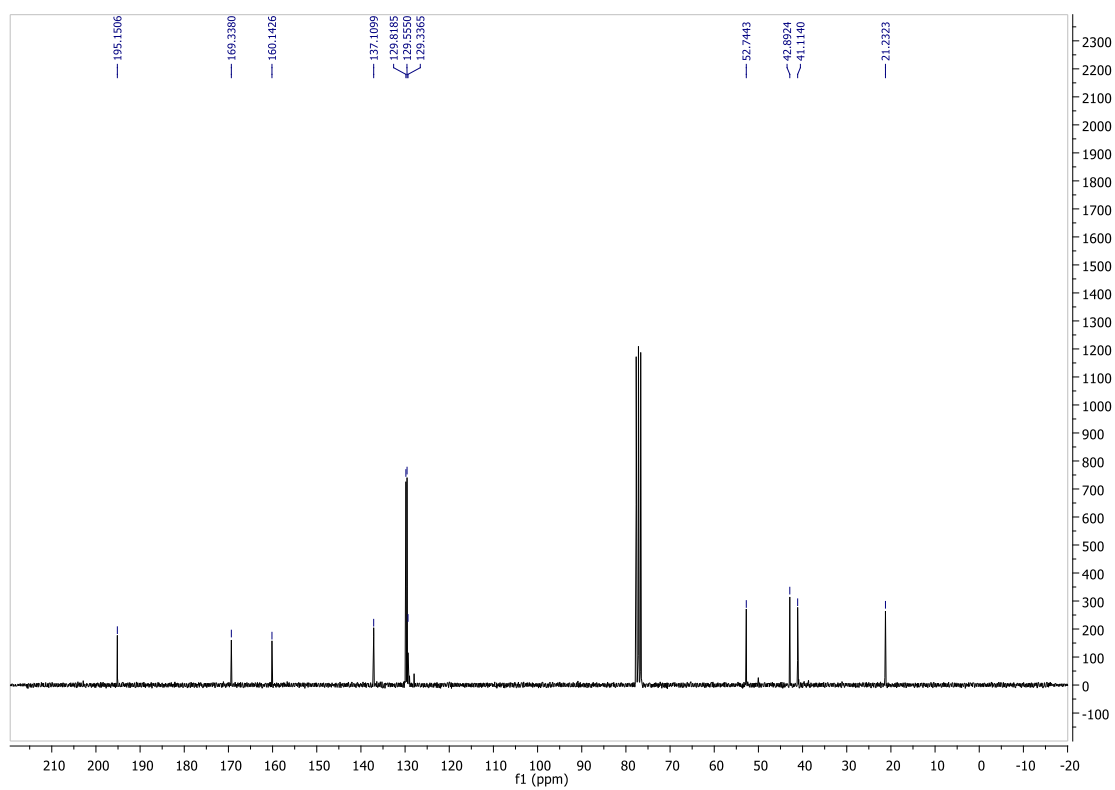

# Compound 2f

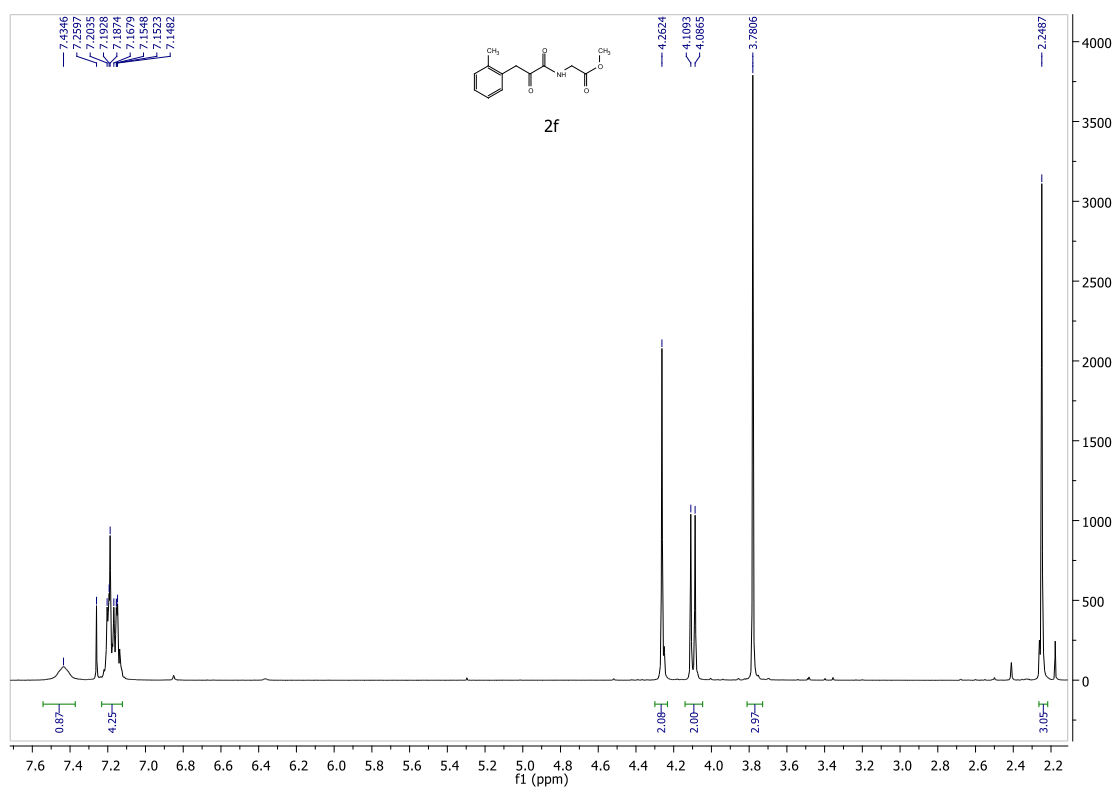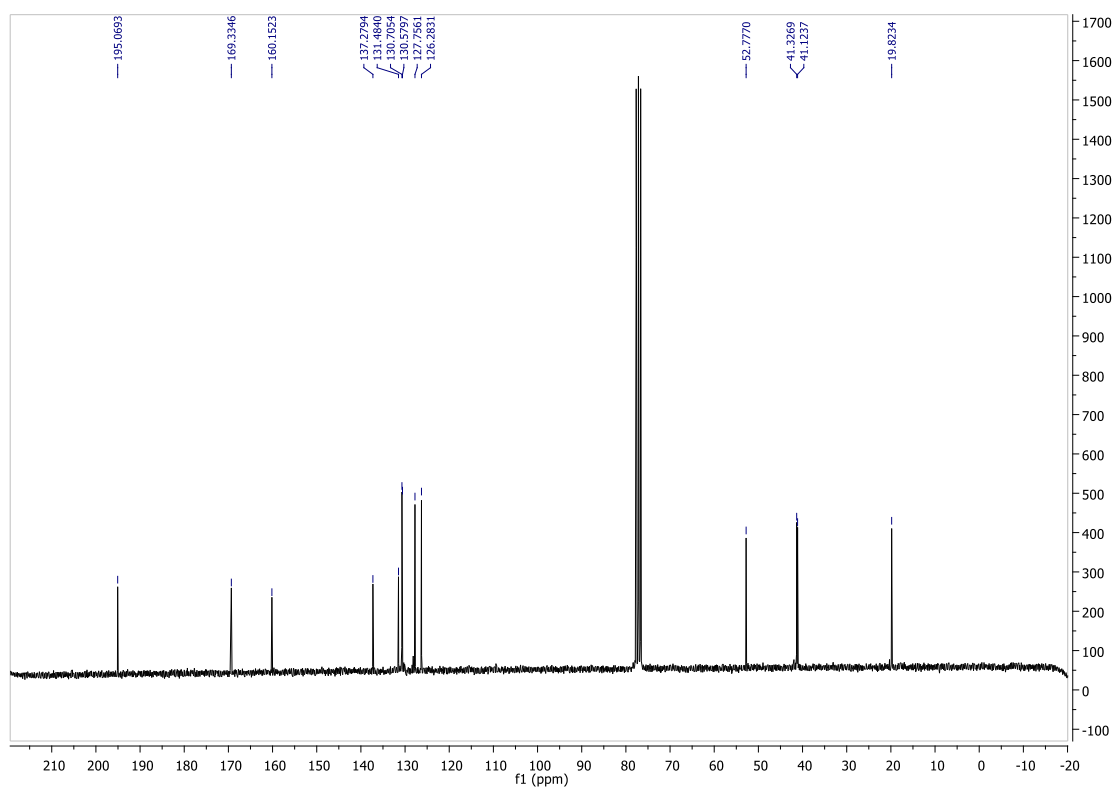

# Compound 2g

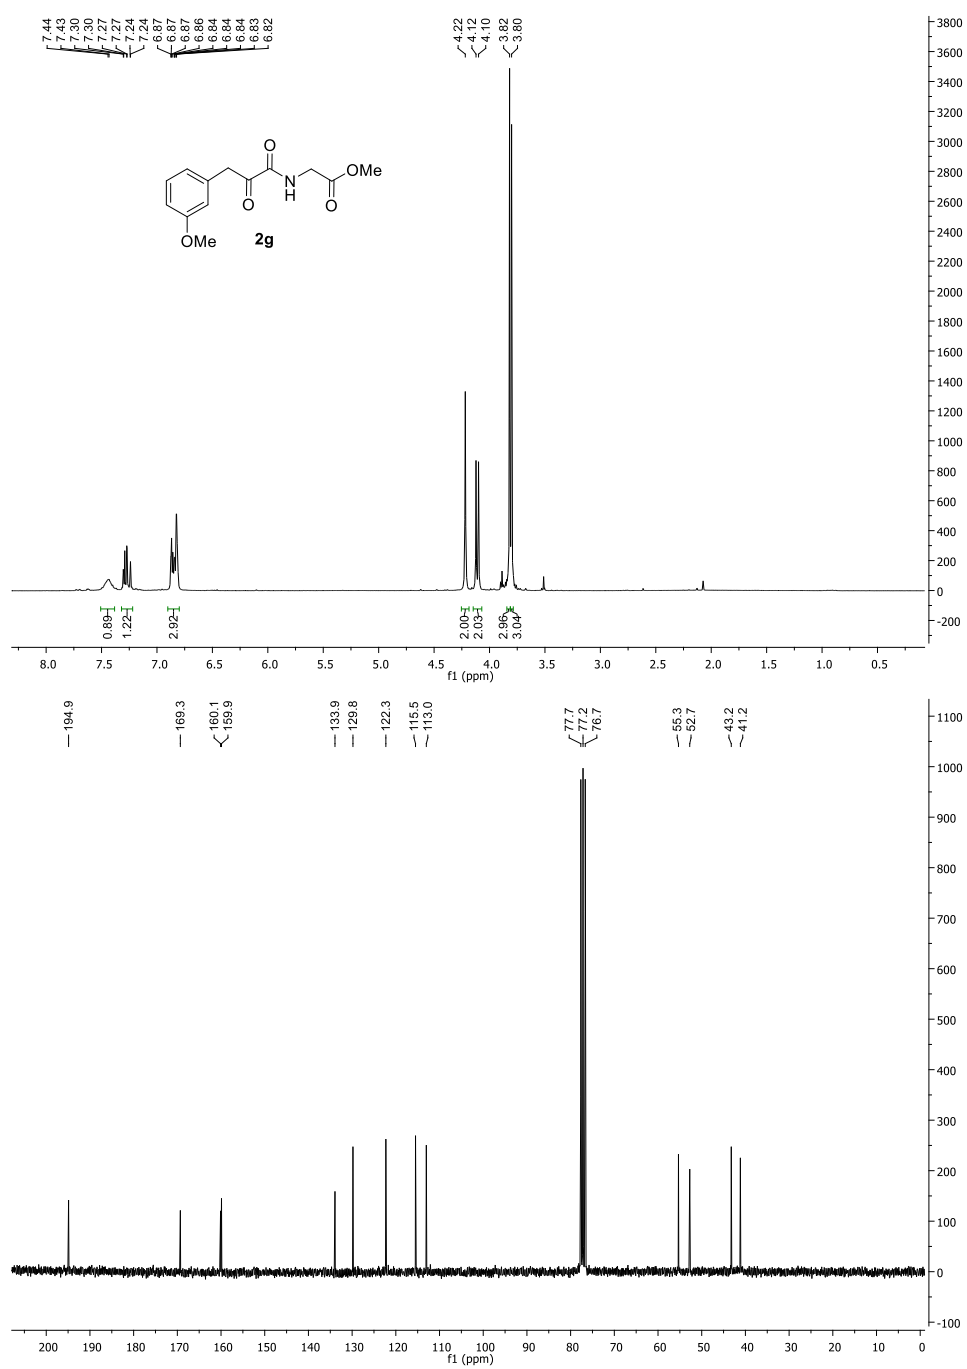

## Compound 2h

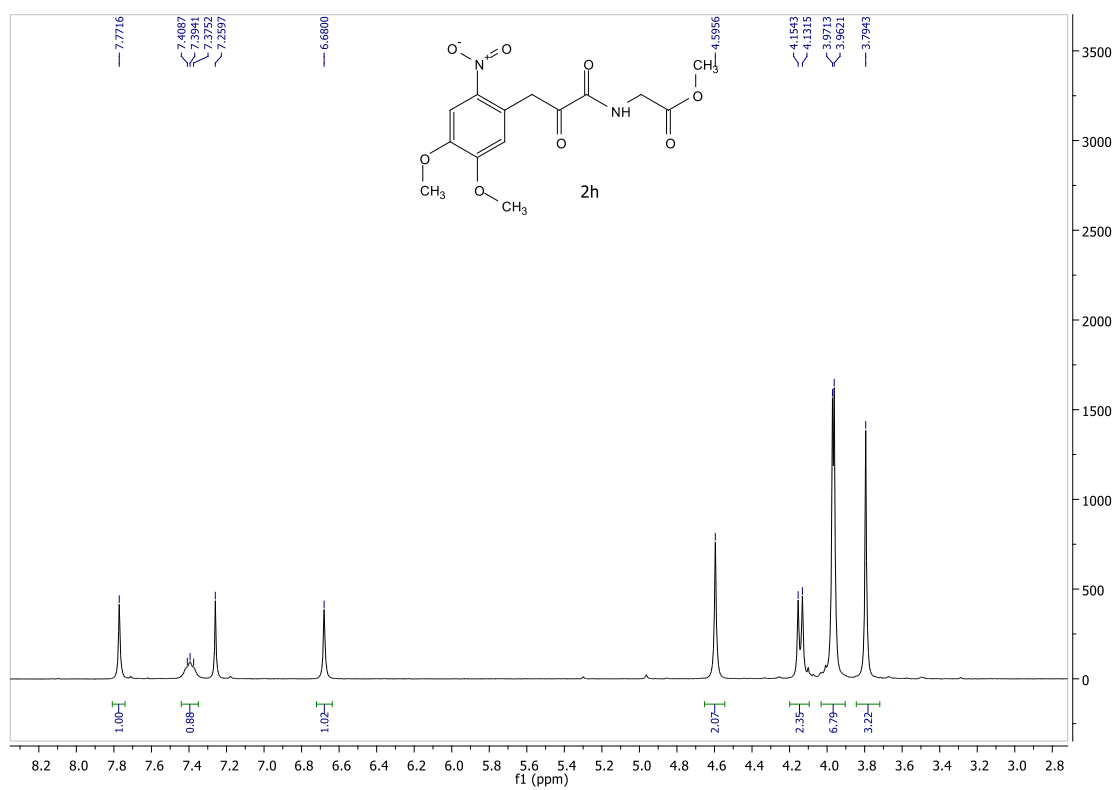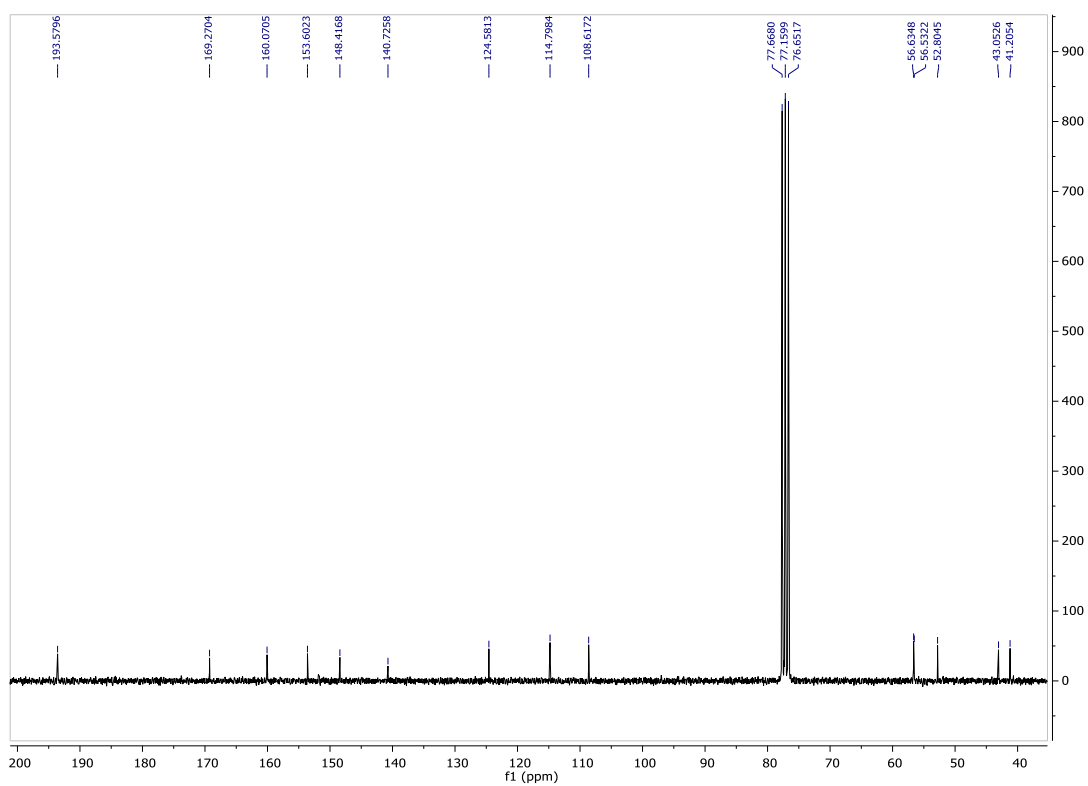

## Compound 2i

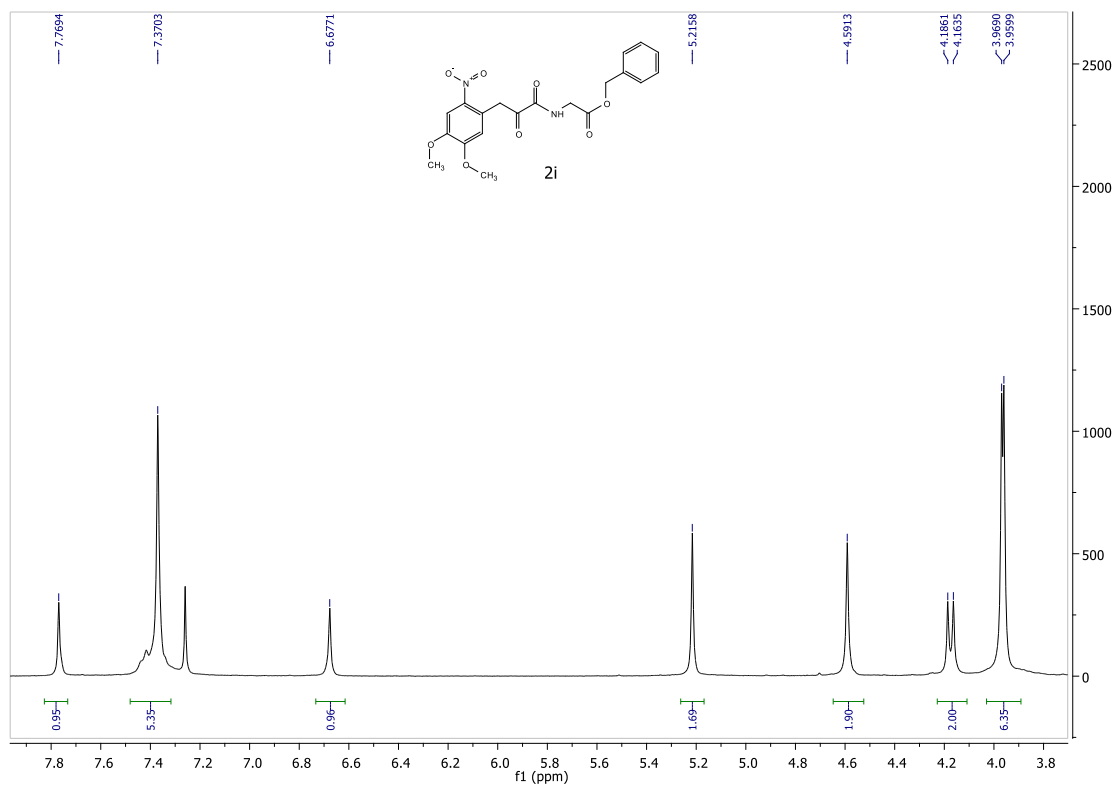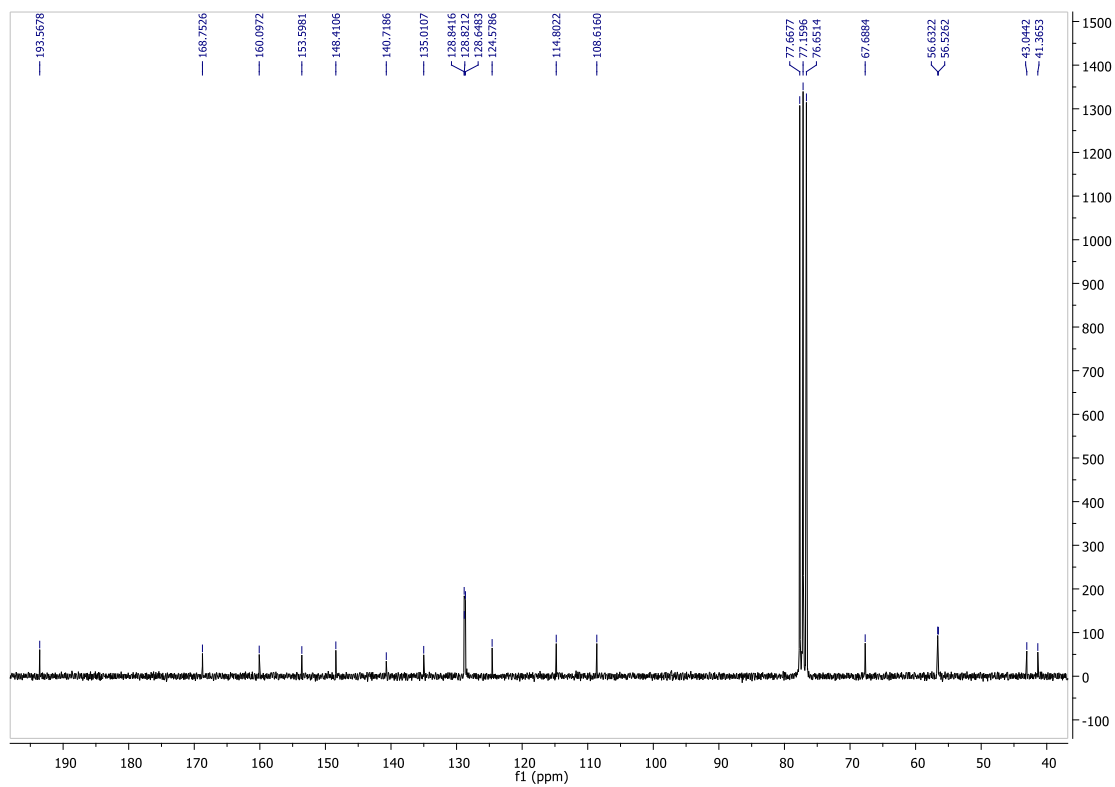

# Compound 4a

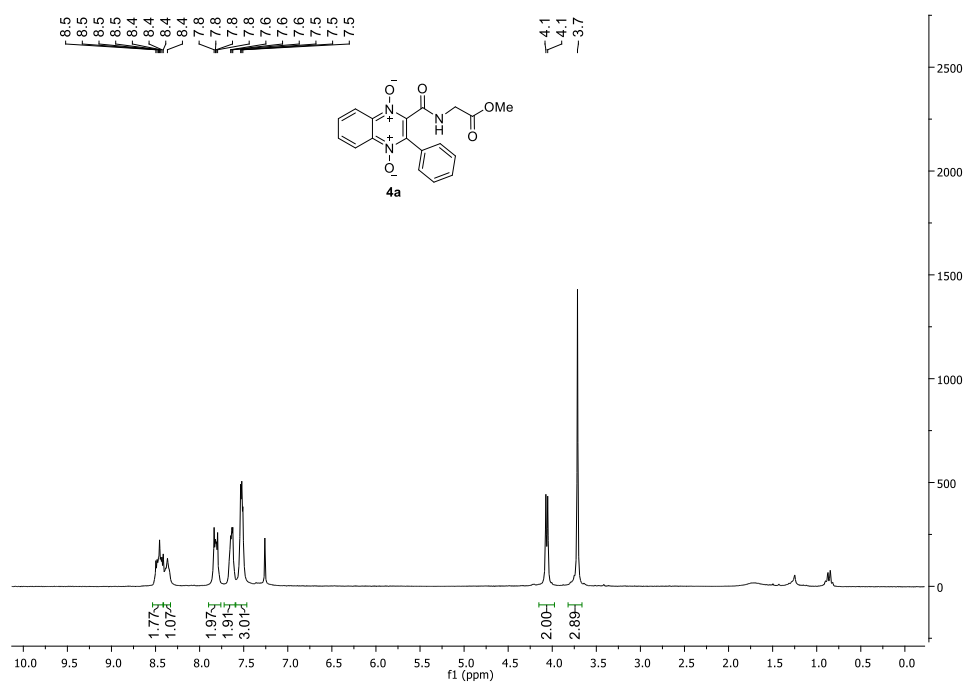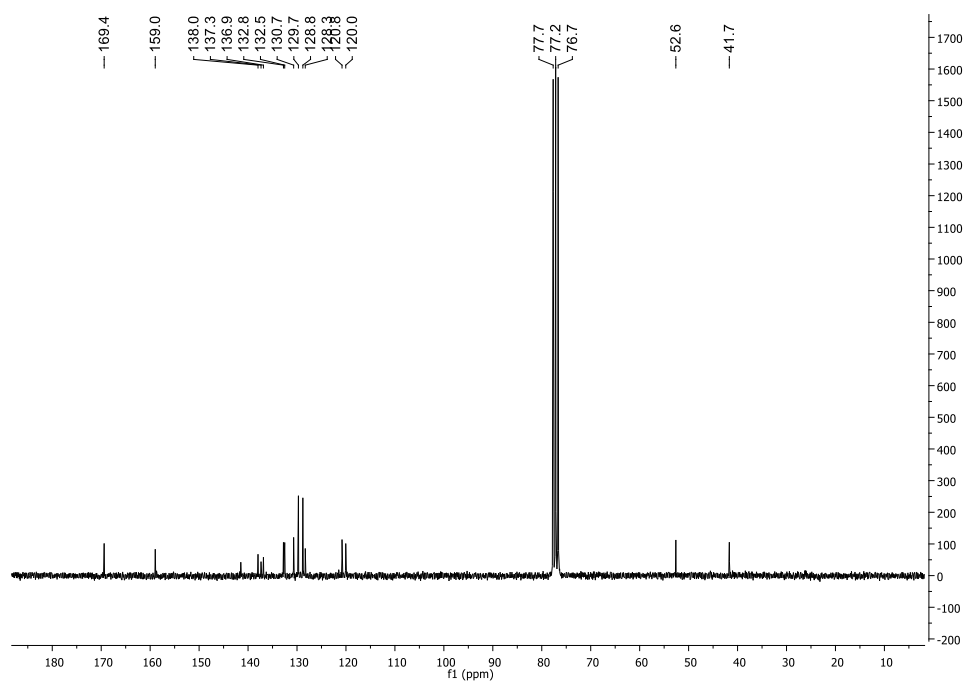

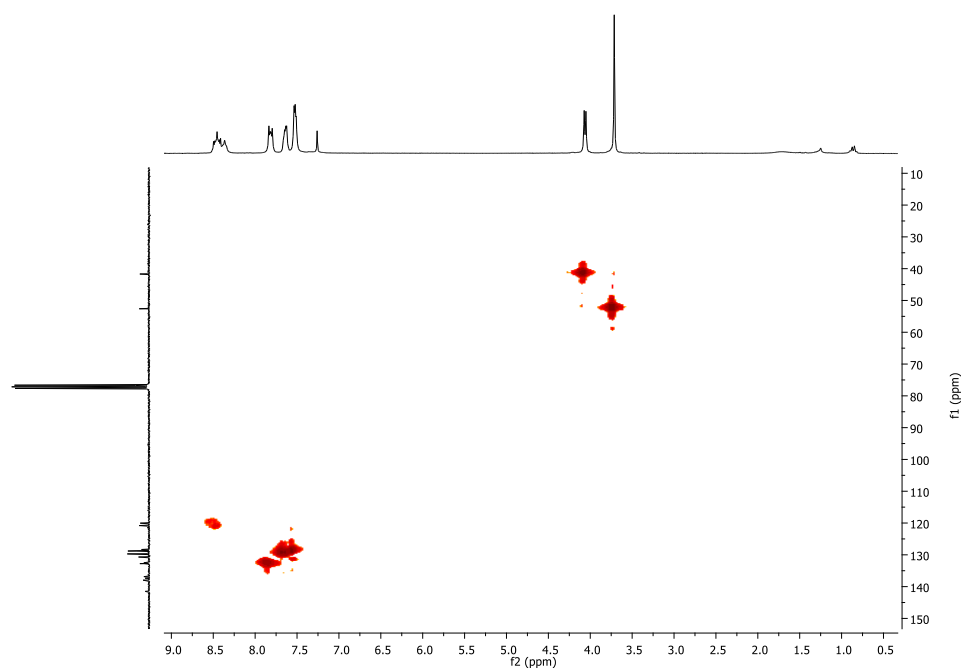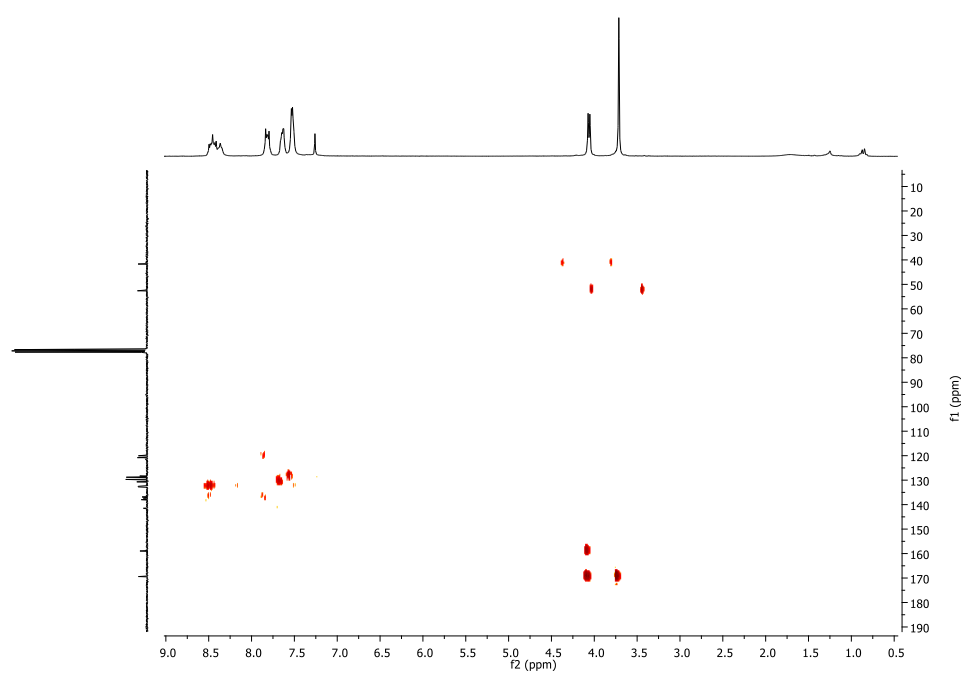

## Compound 4b

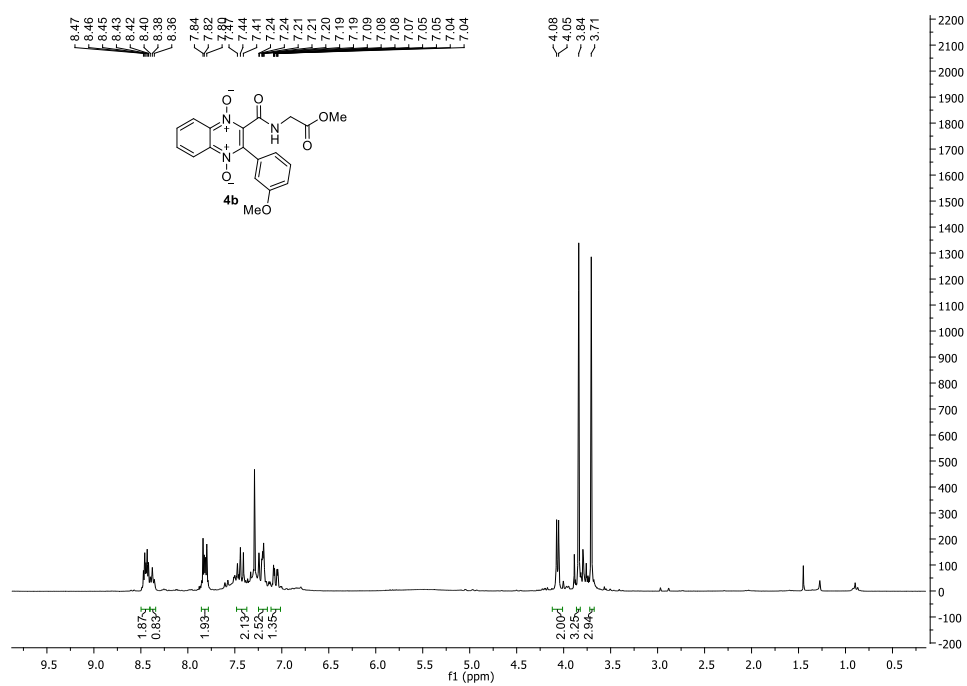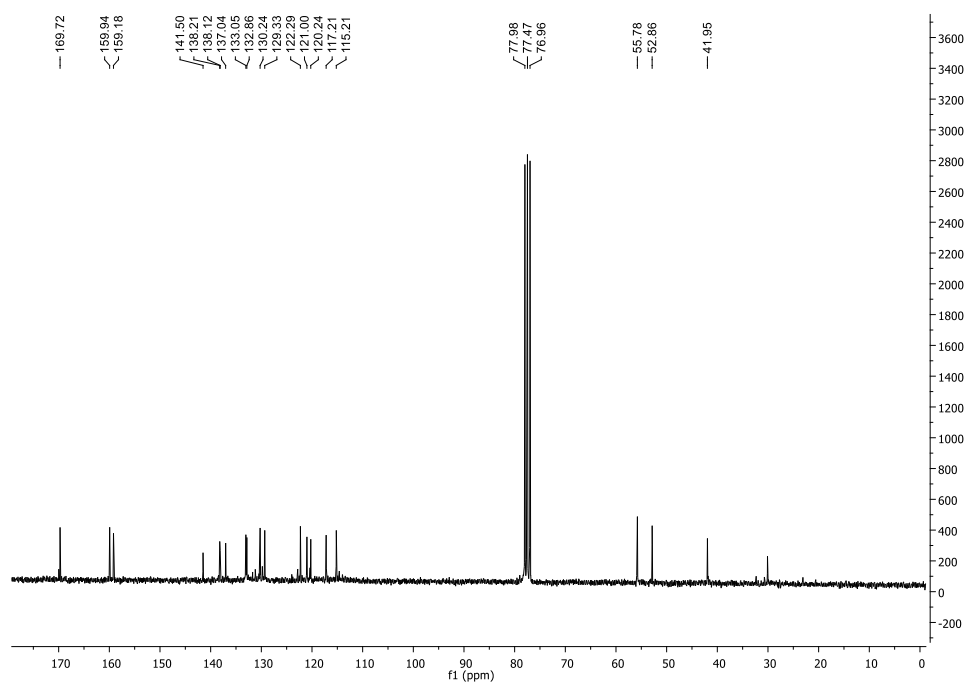



# Compound 4c

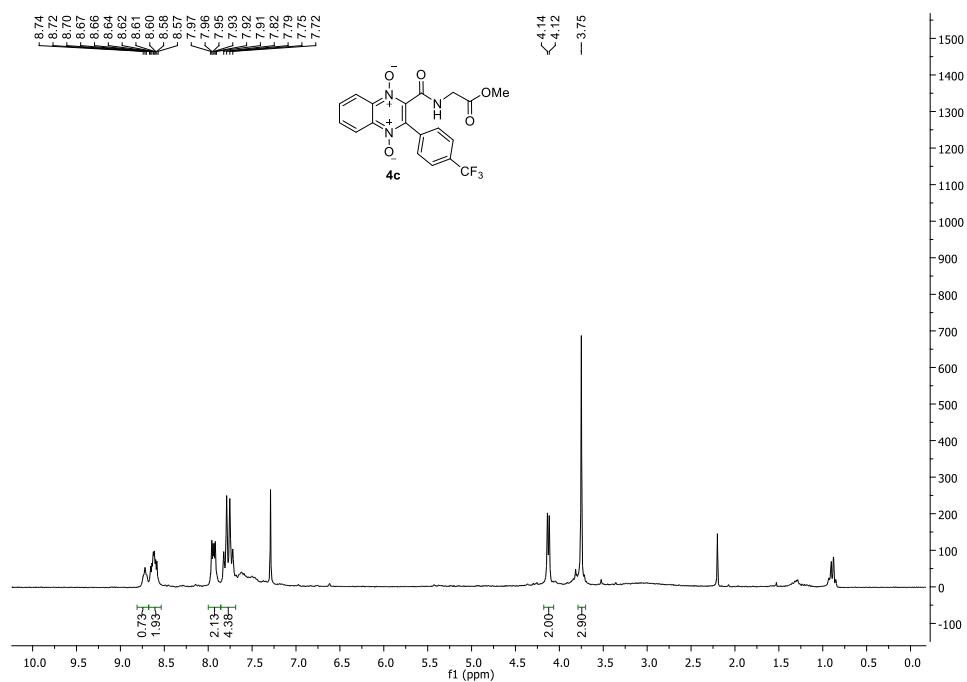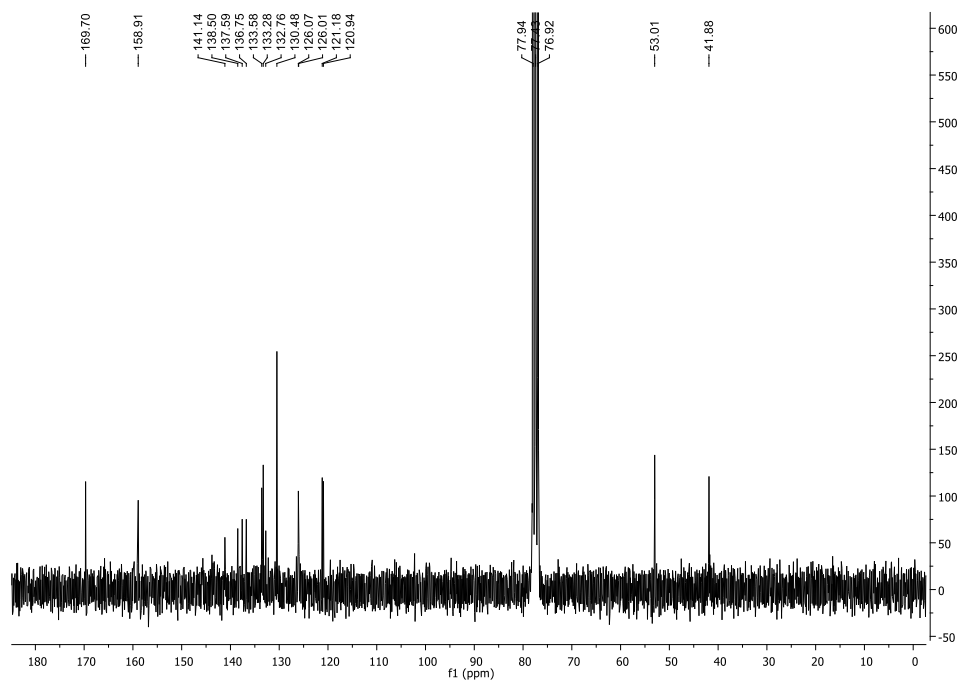

# Compound 4d

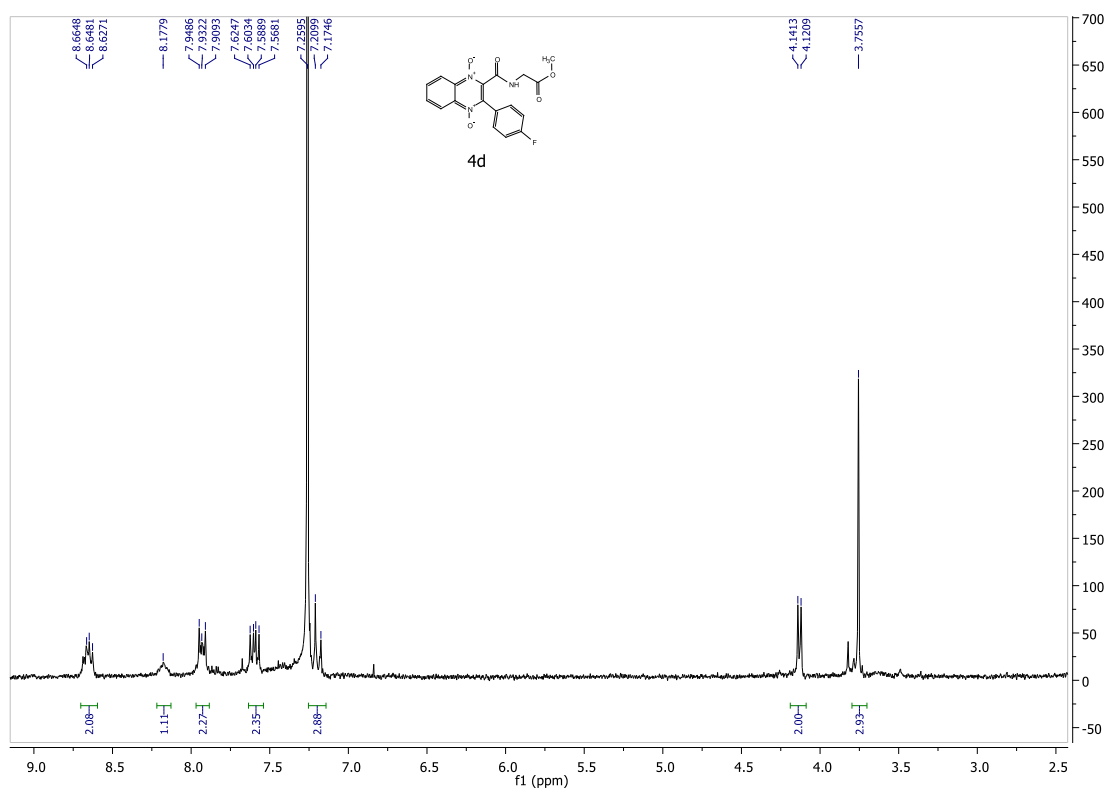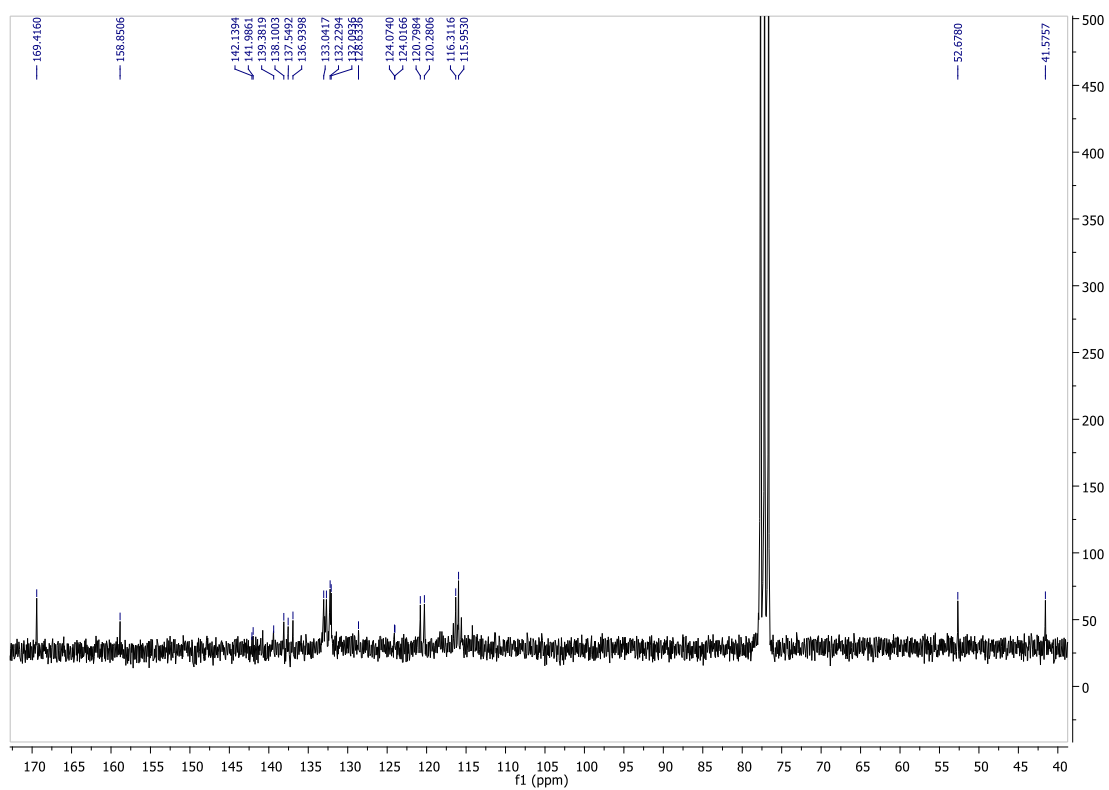

# Compound 4e

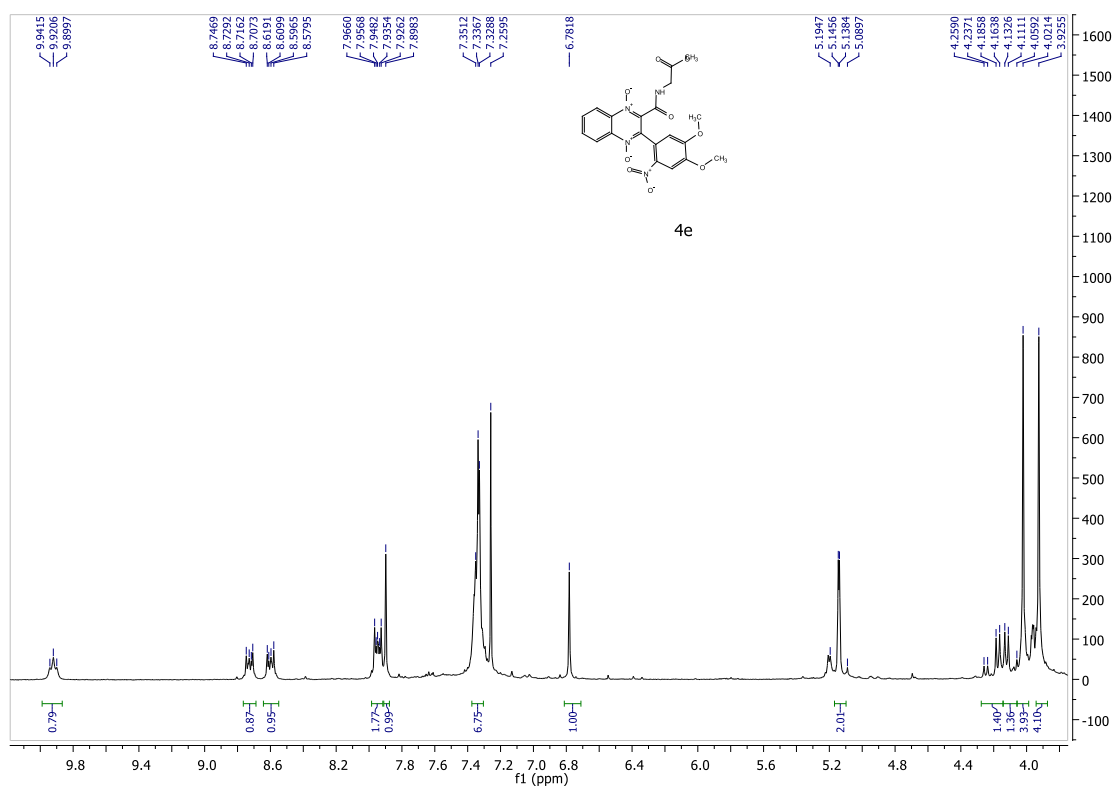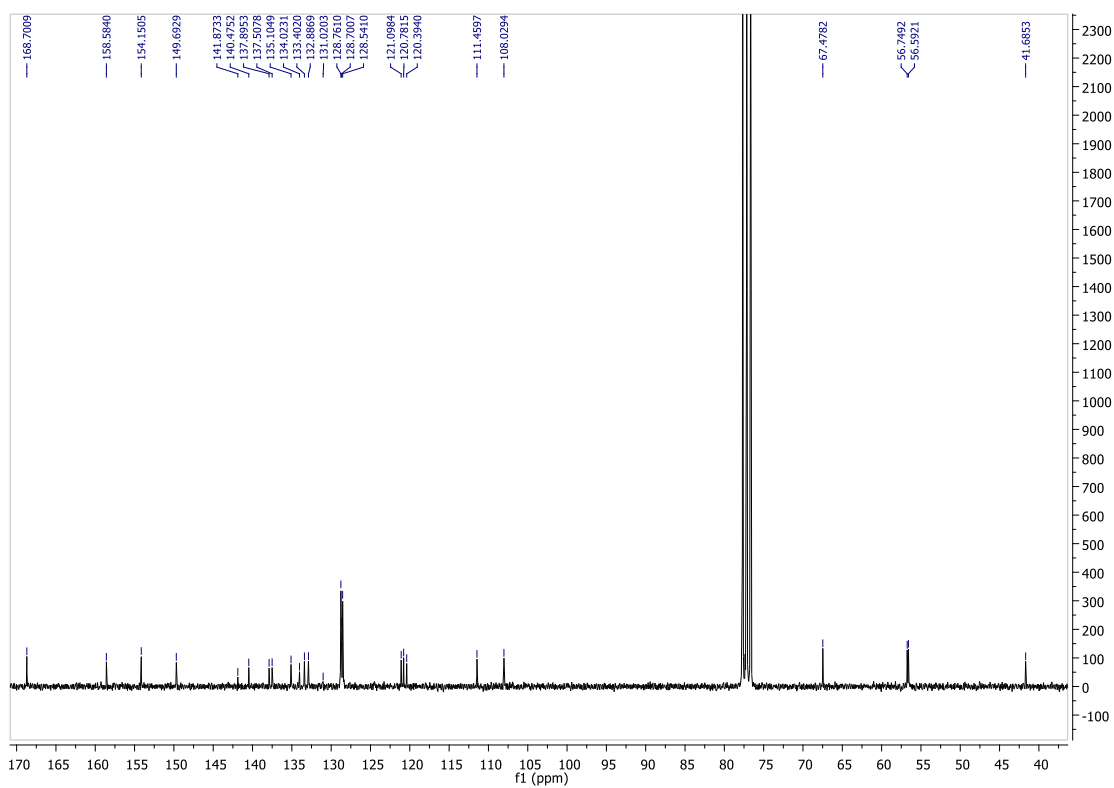

# Compound 4f

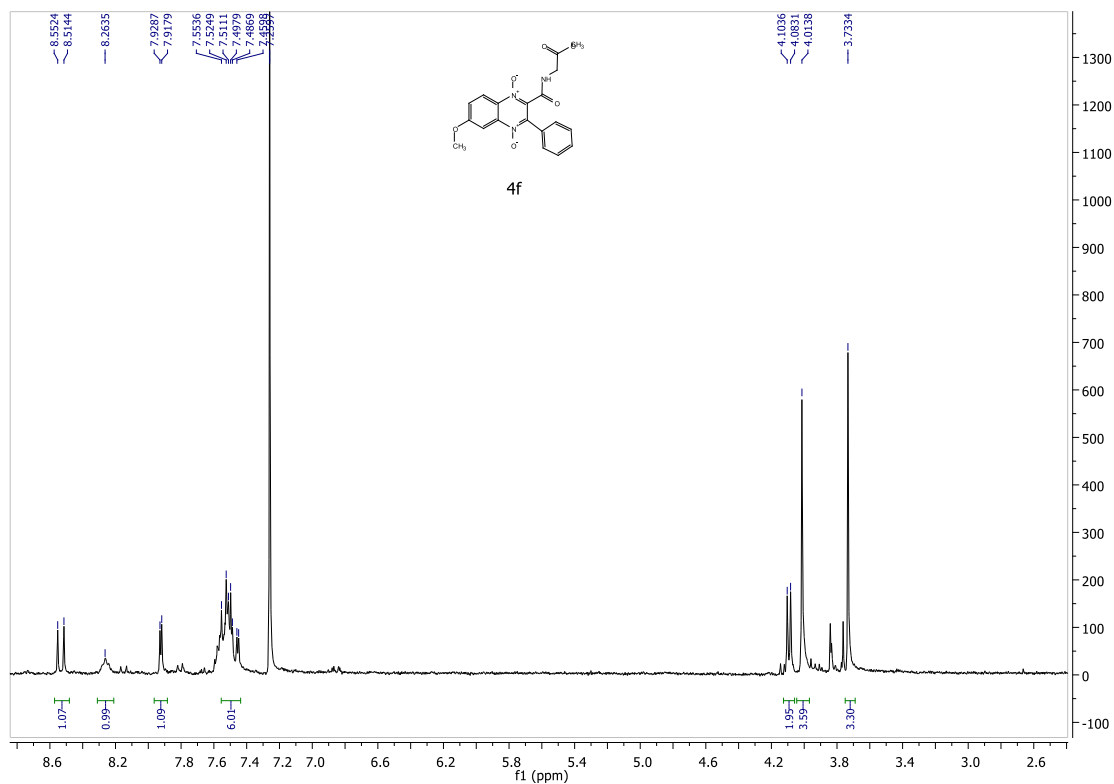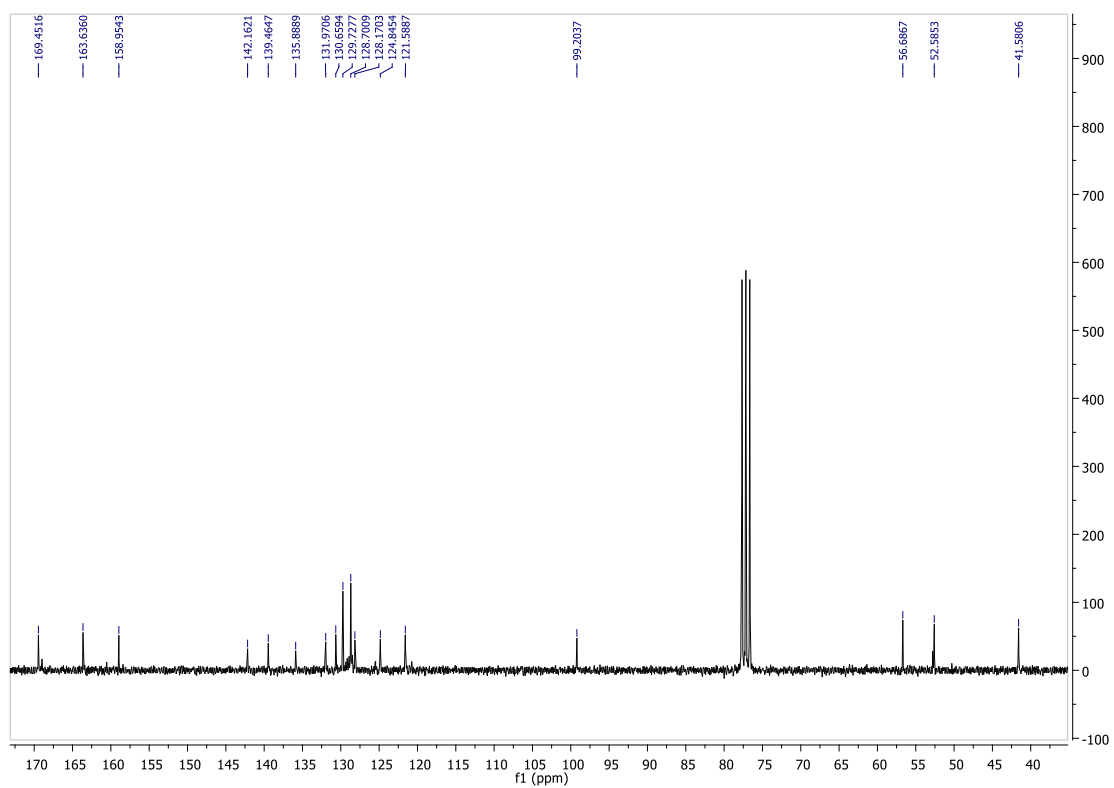

# Compound 4g

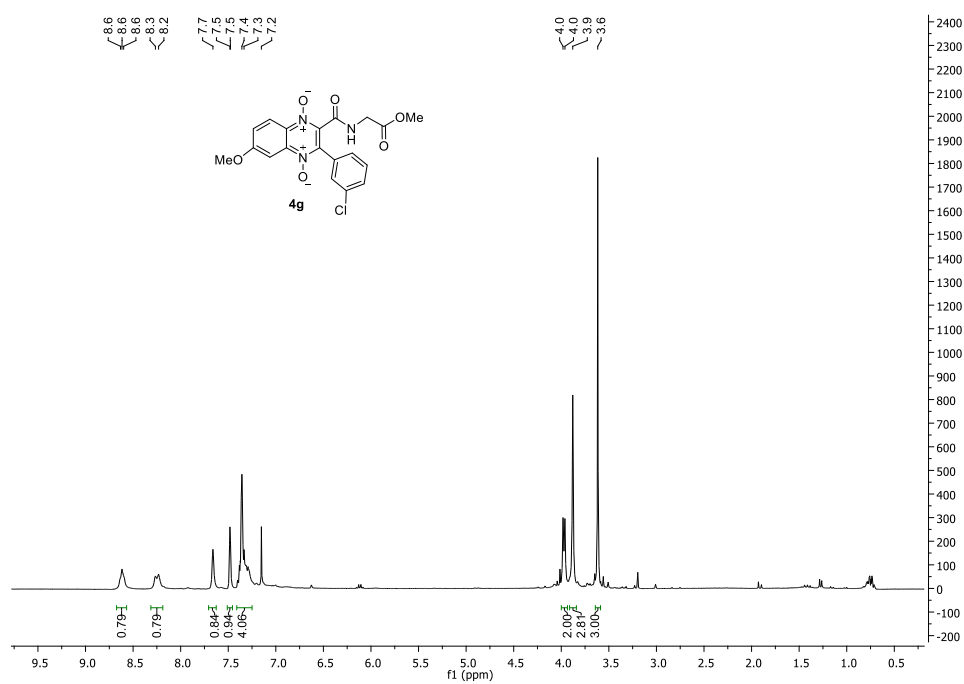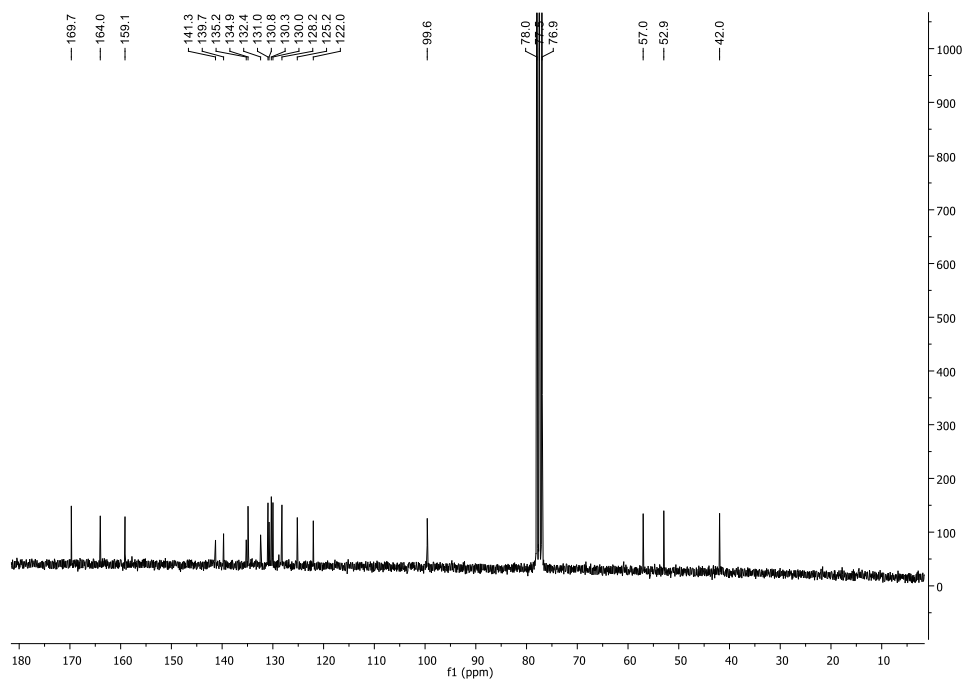

# Compound 4h

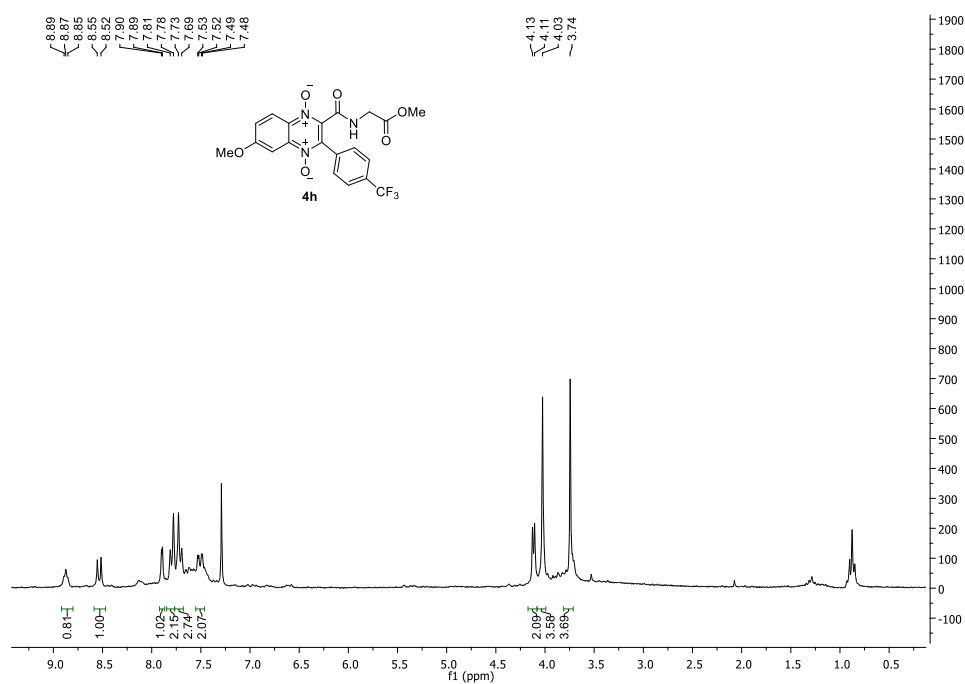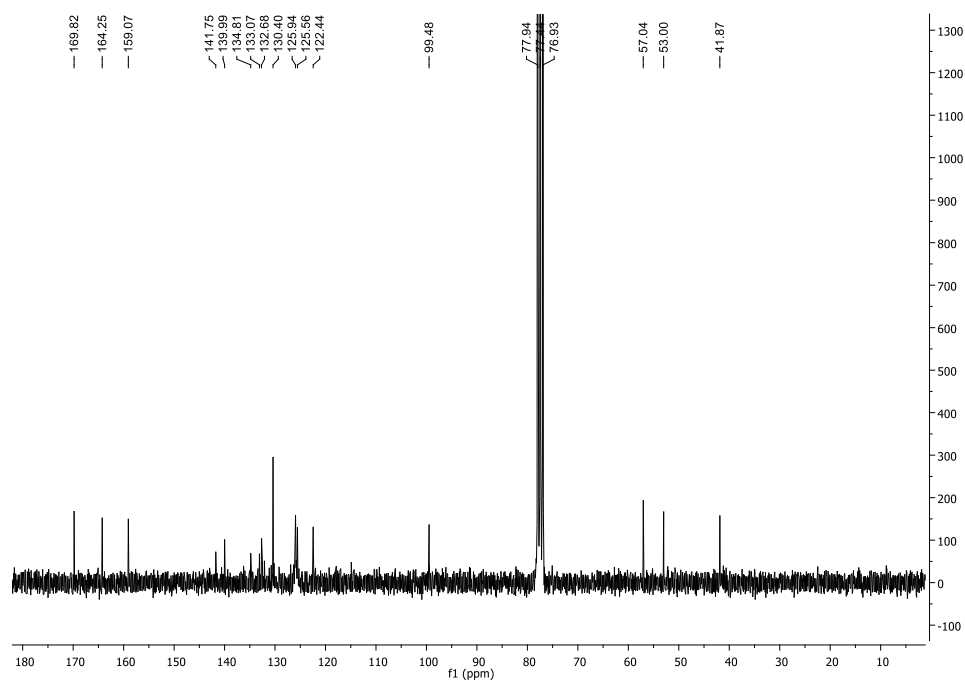

# Compound 4i

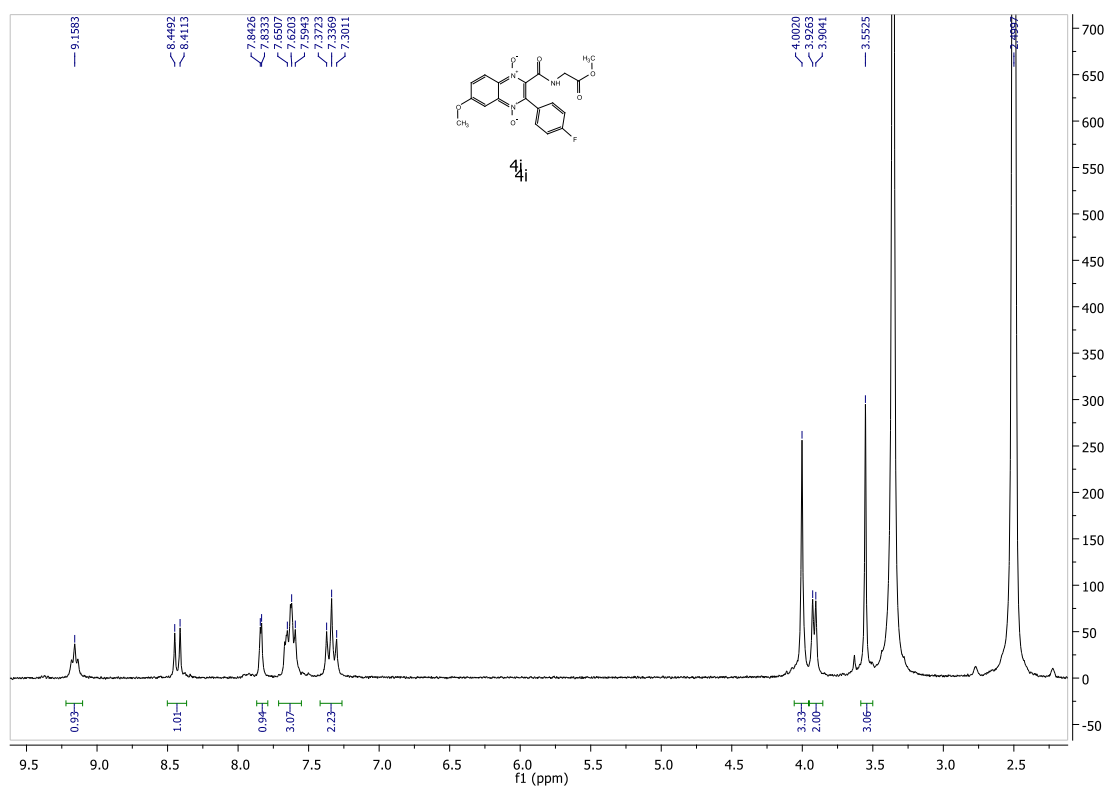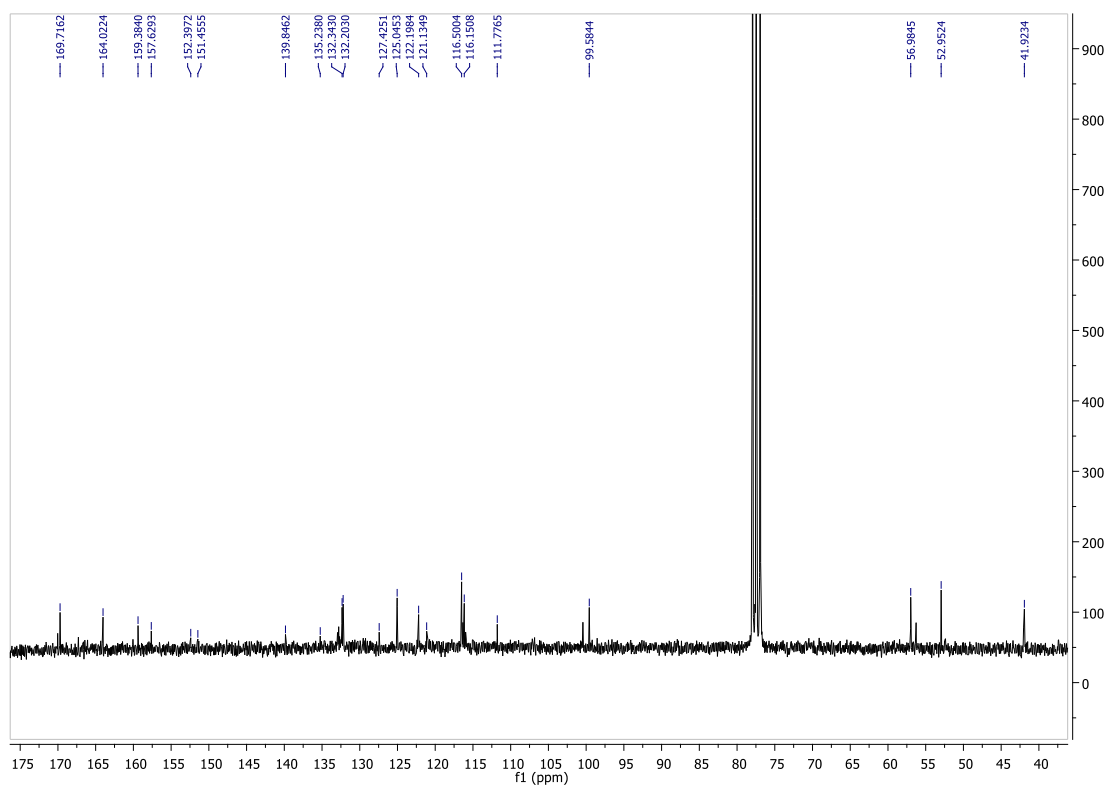

# Compound 4j

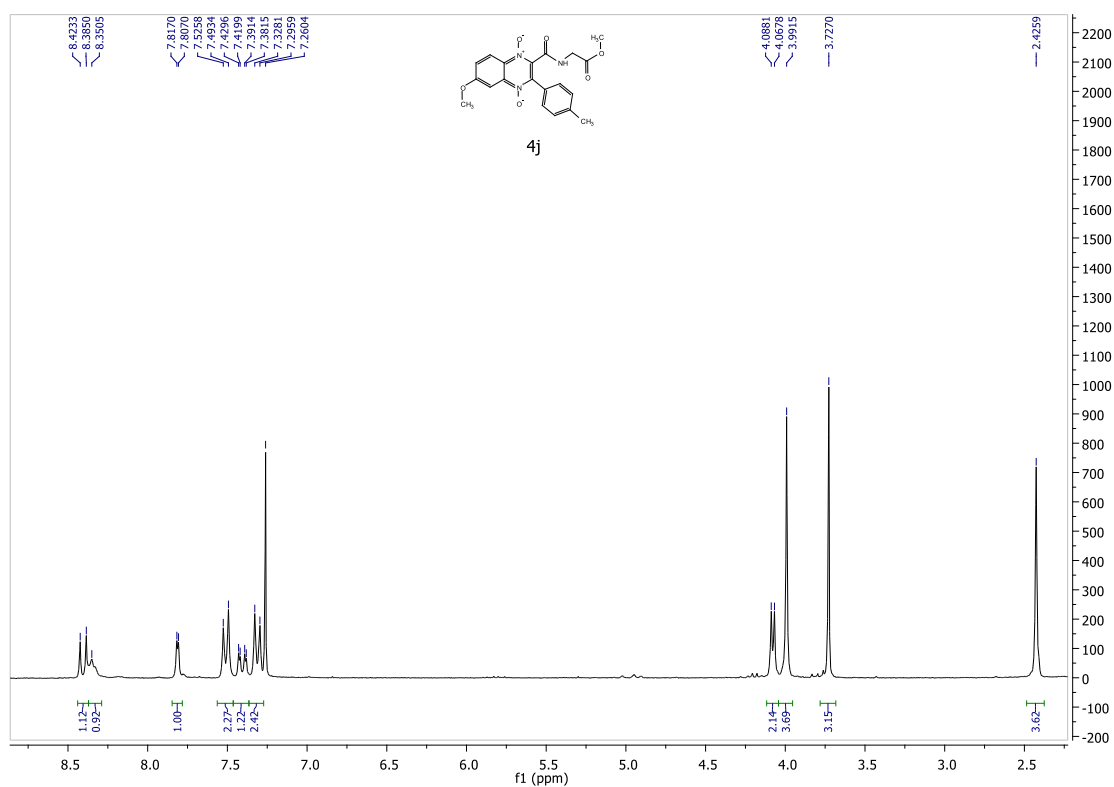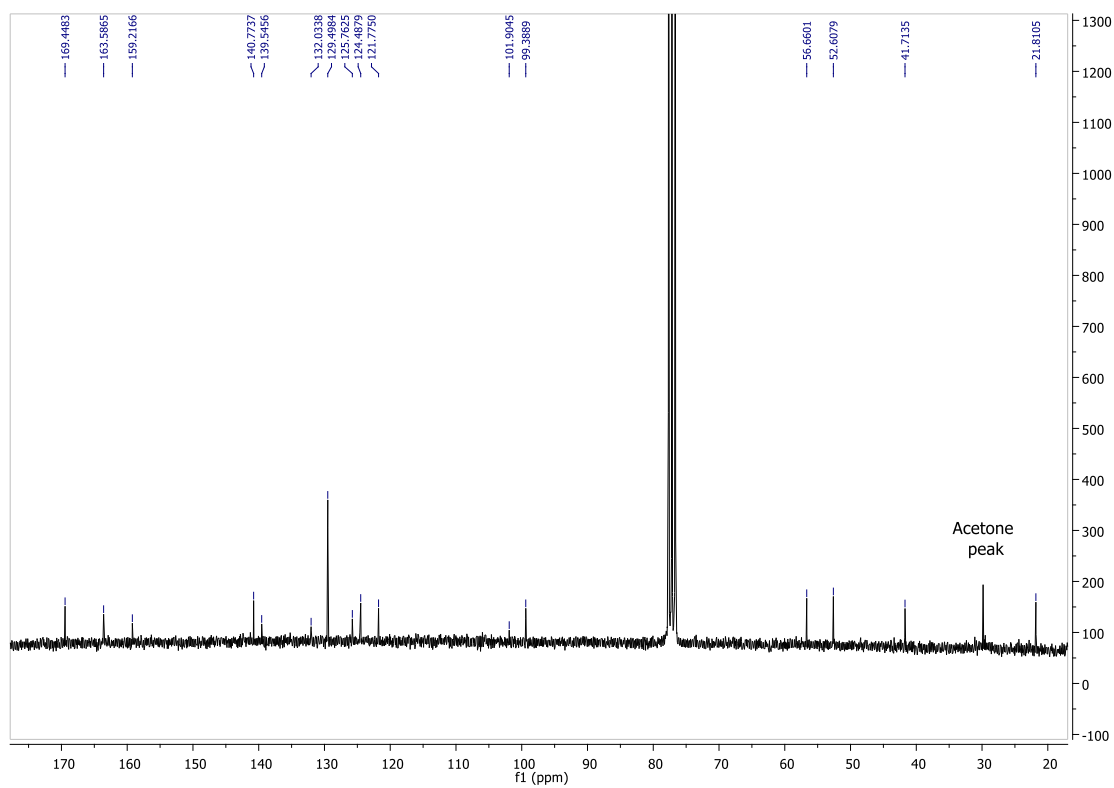



# Compound 4k

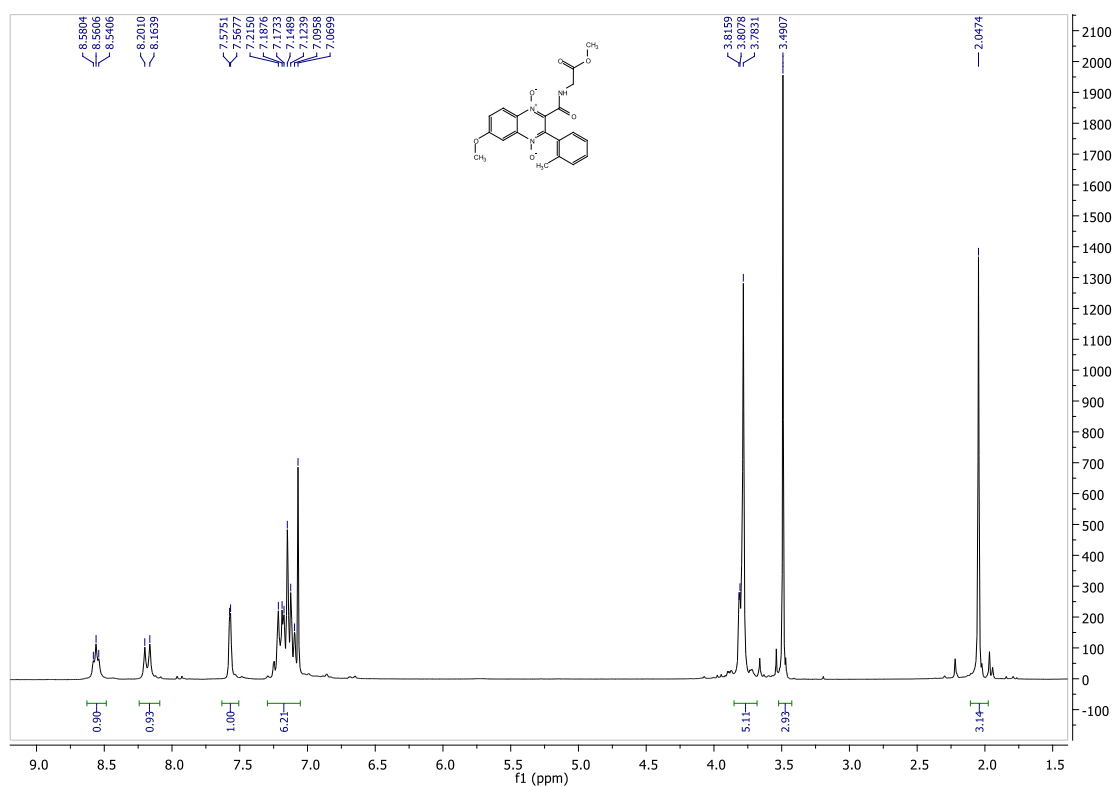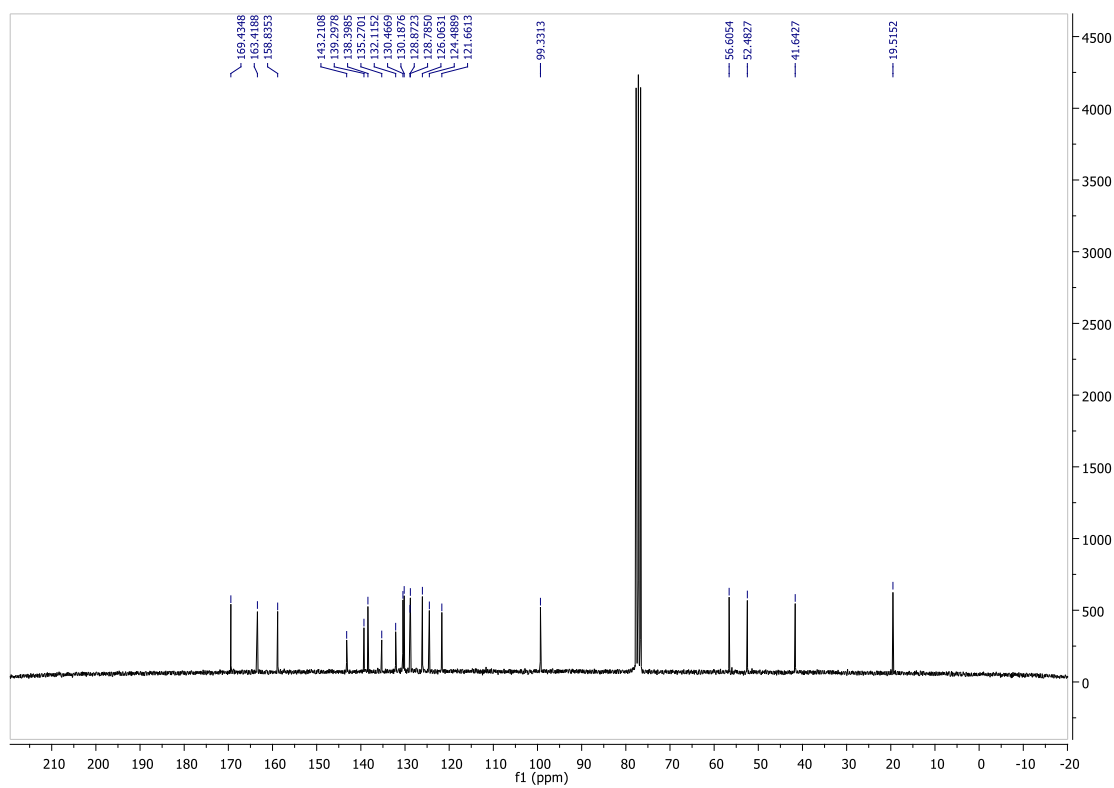

# Compound 4l

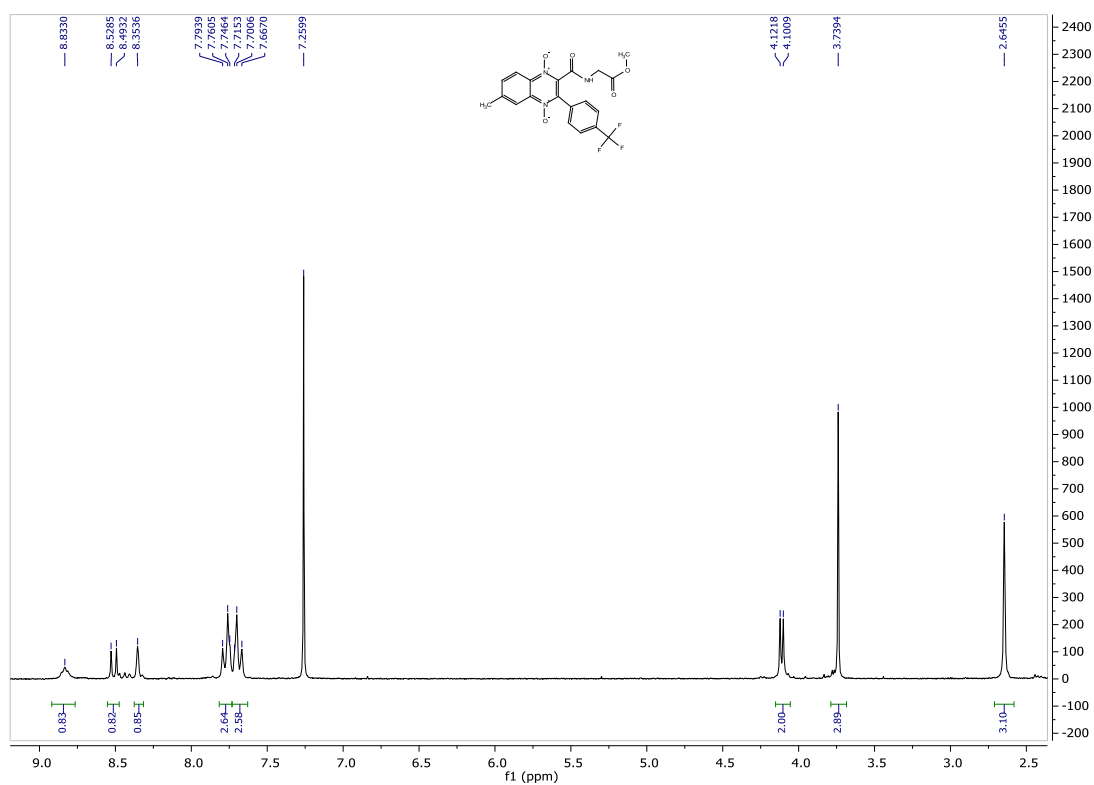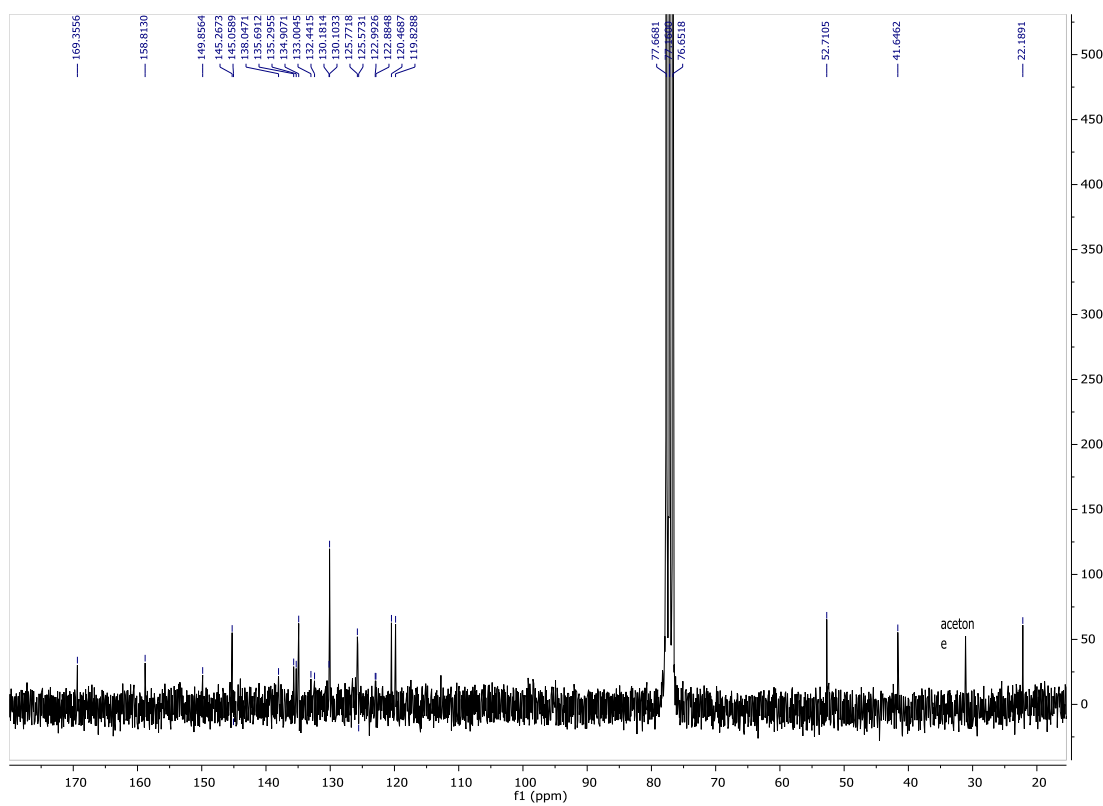

# Compound 4m

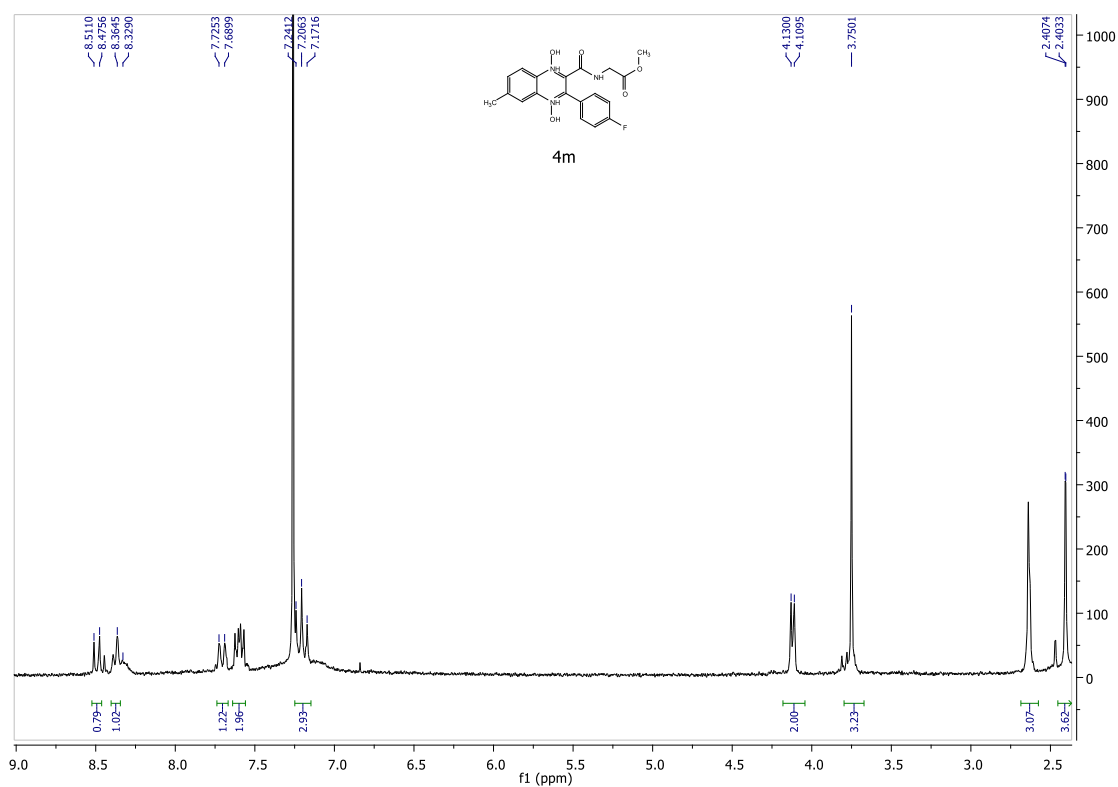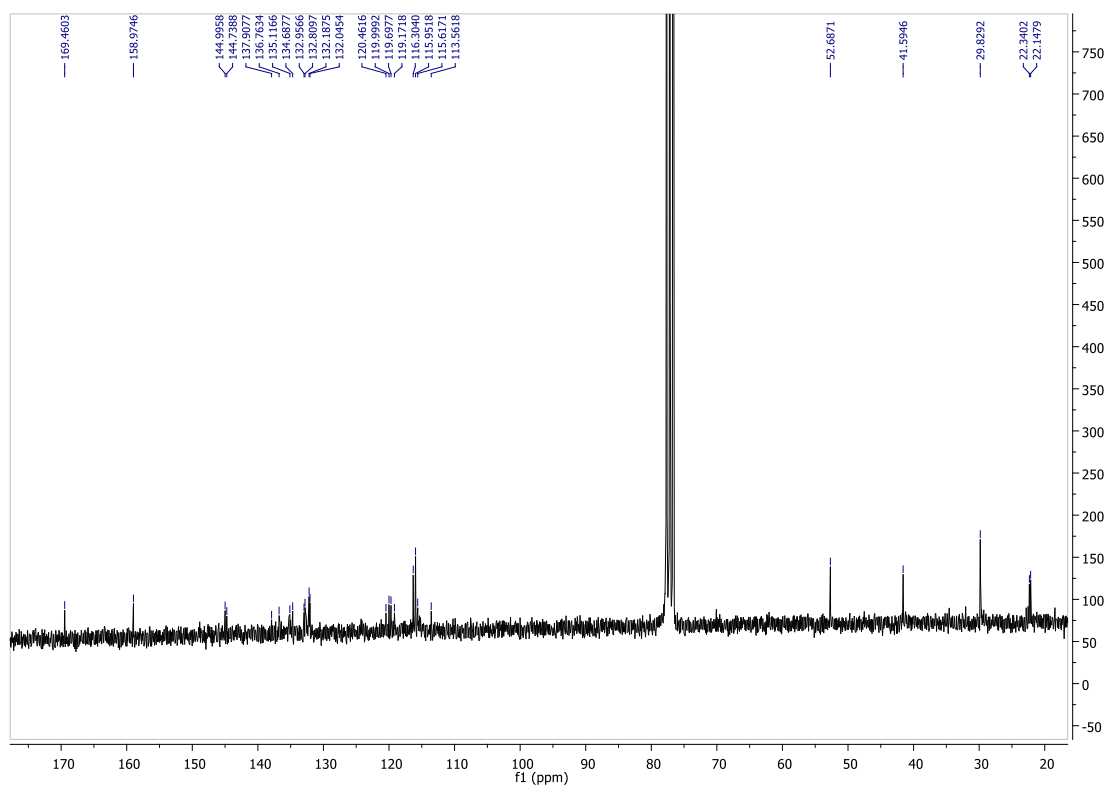

# Compound 4n

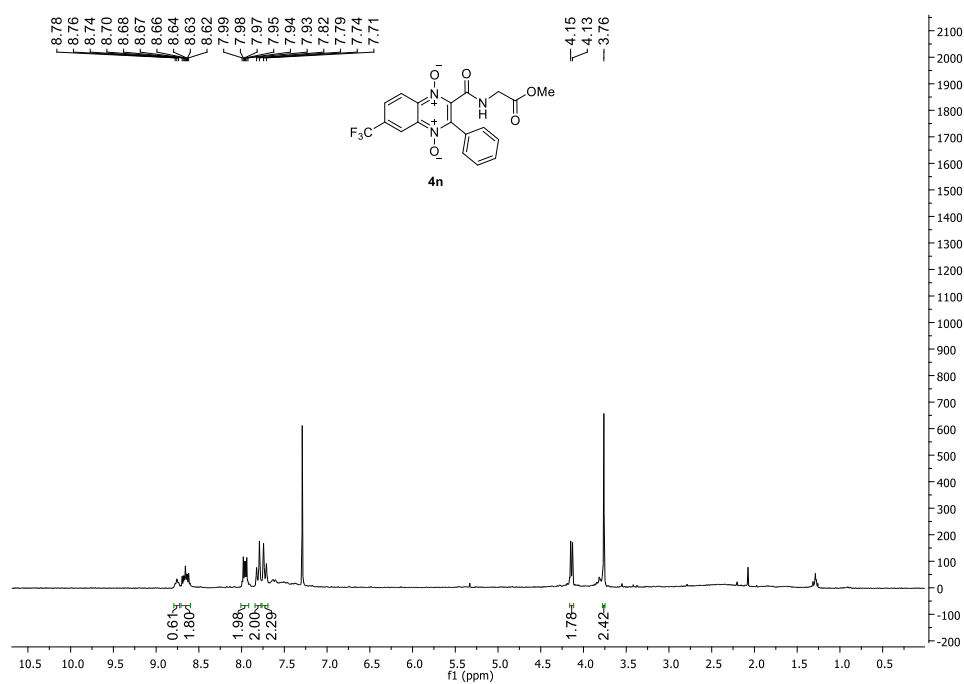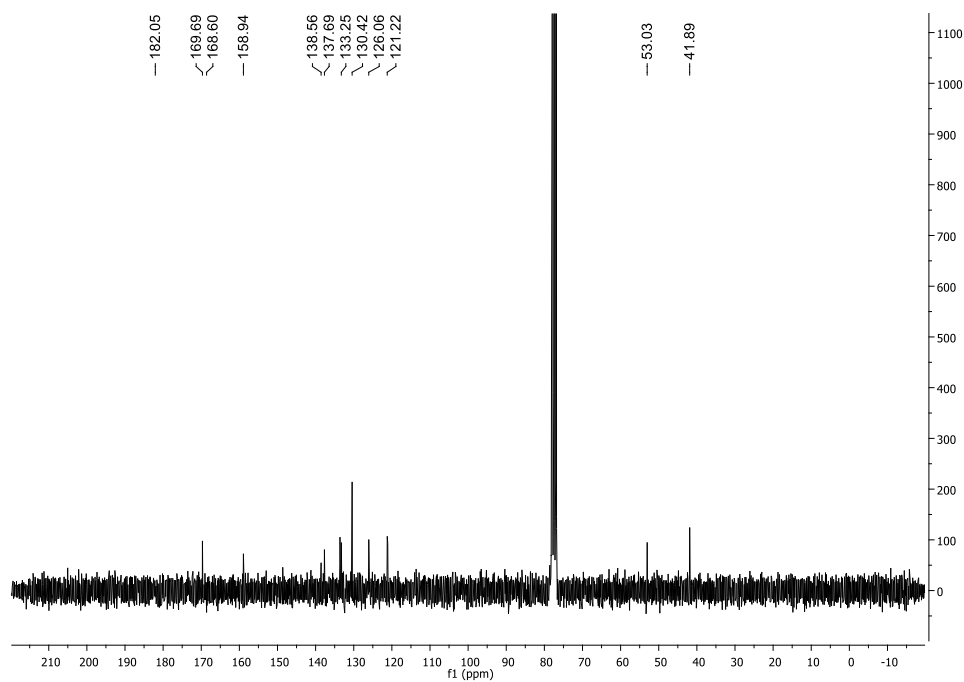

# Compound 5d

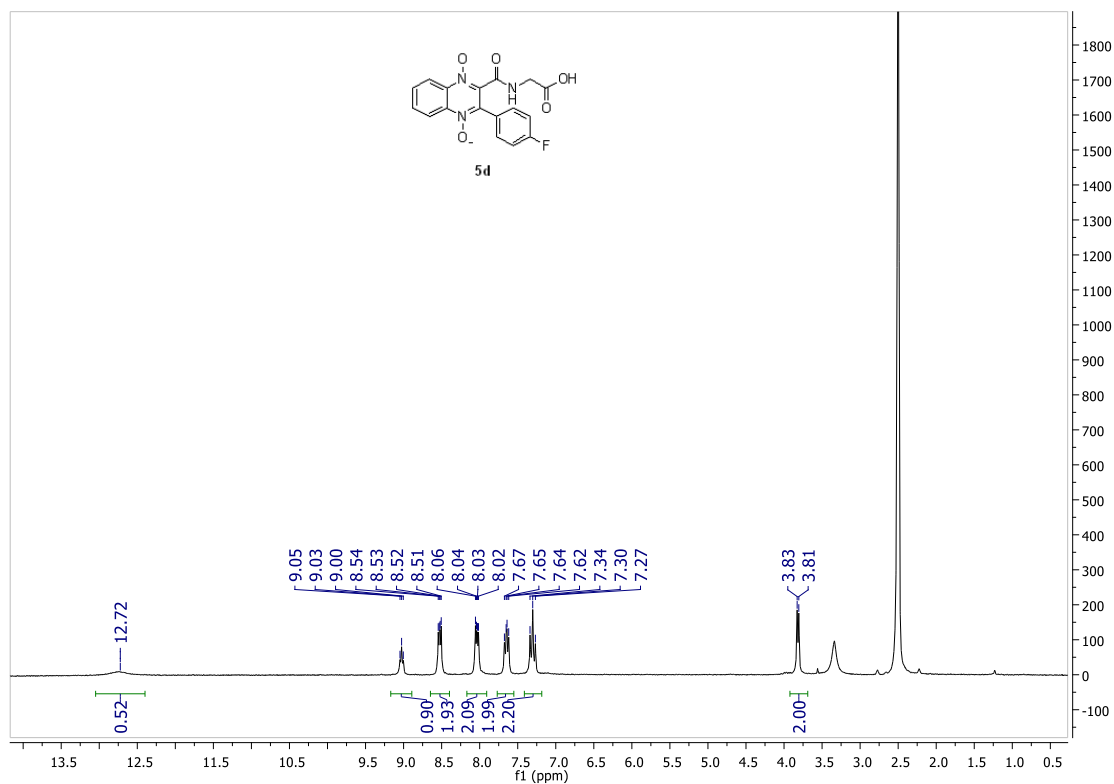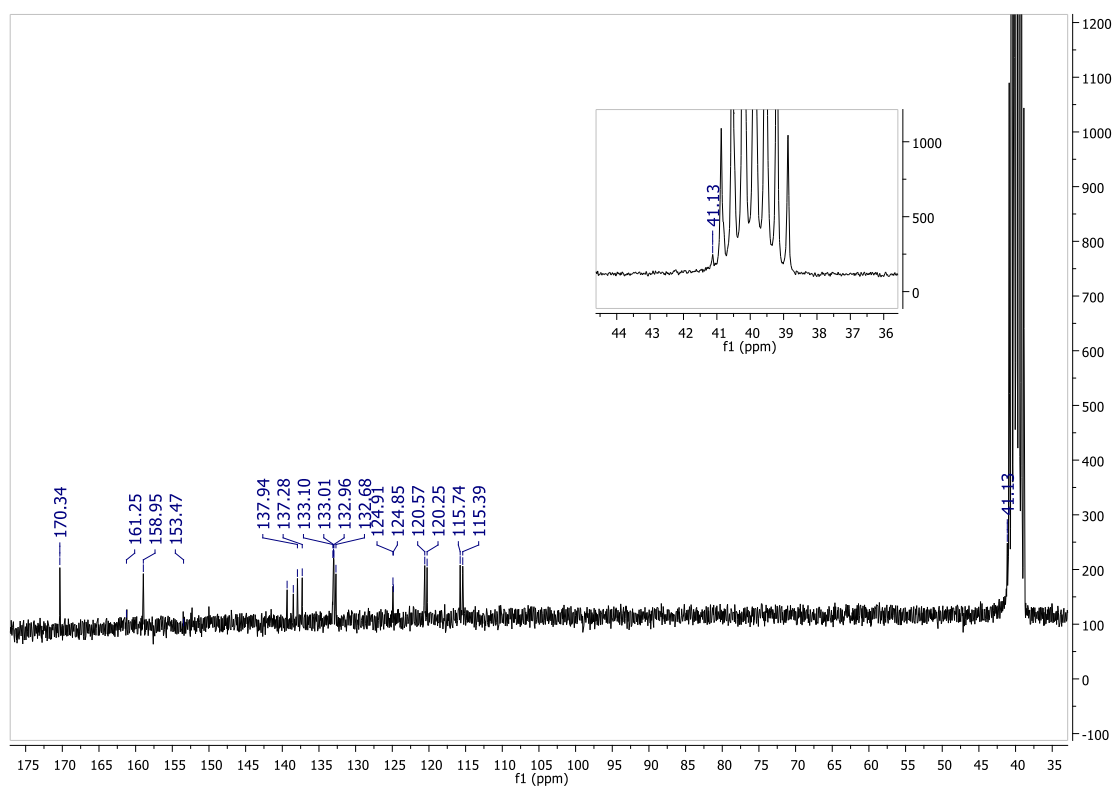

## Compound 5f

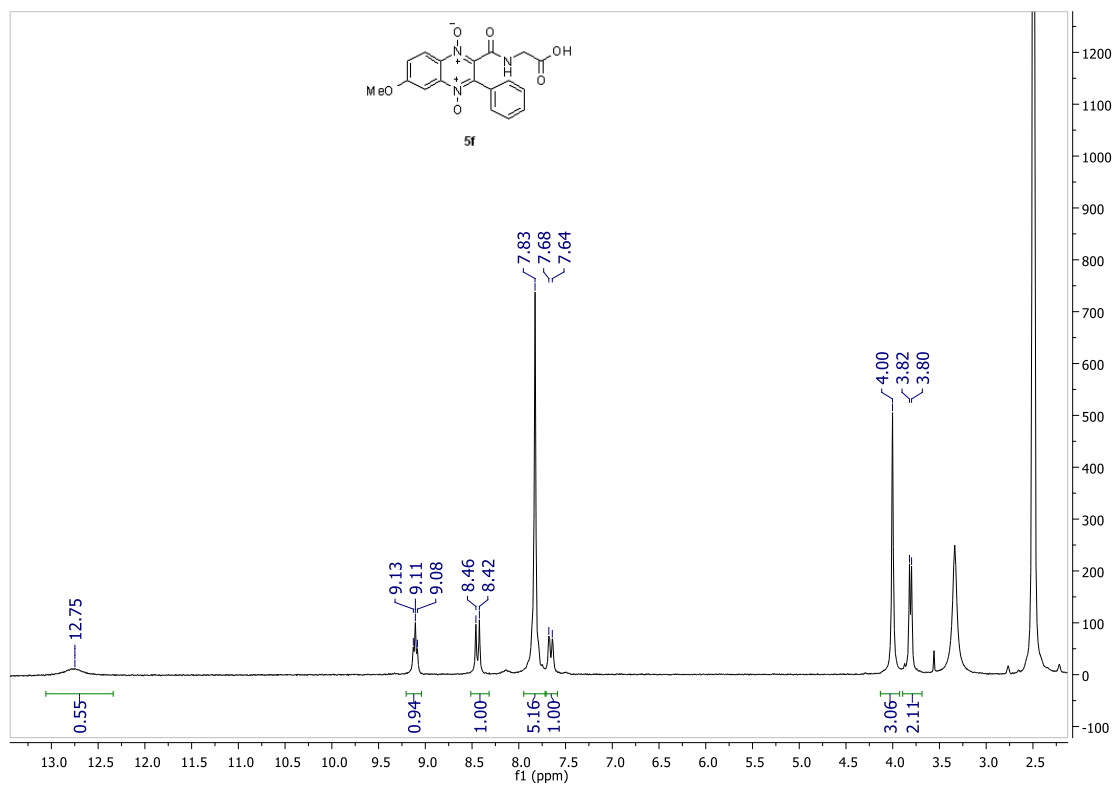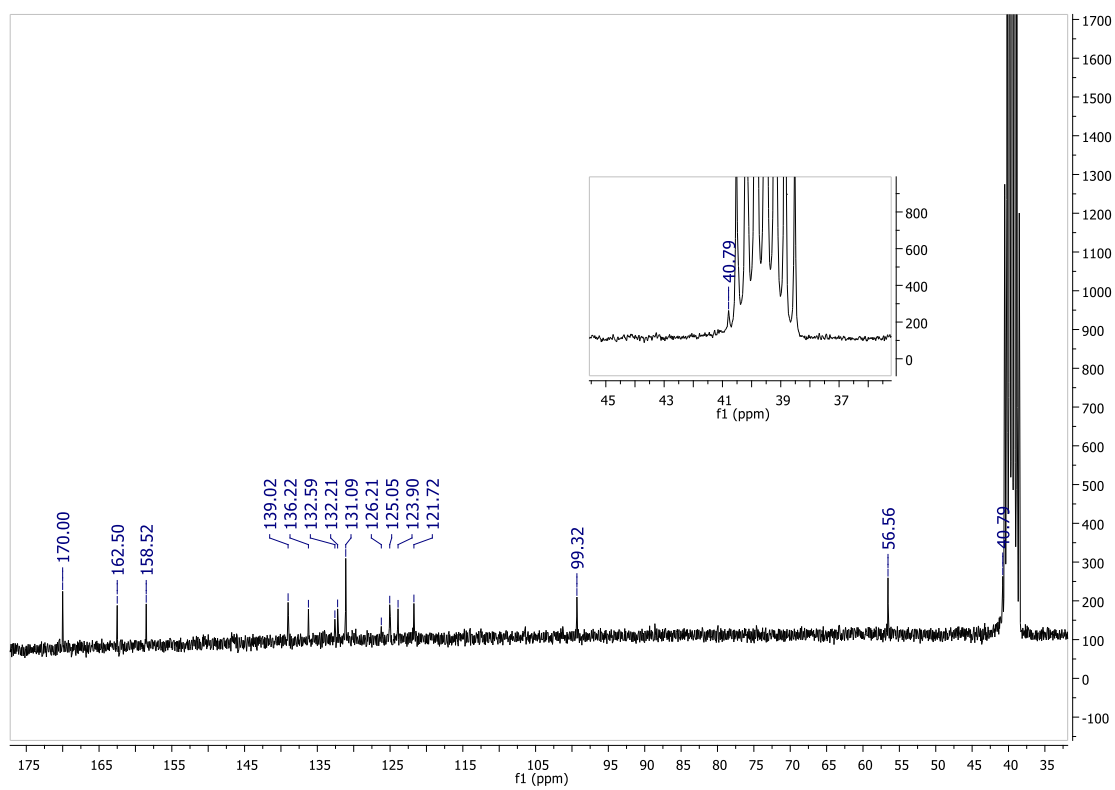

# Compound 5h

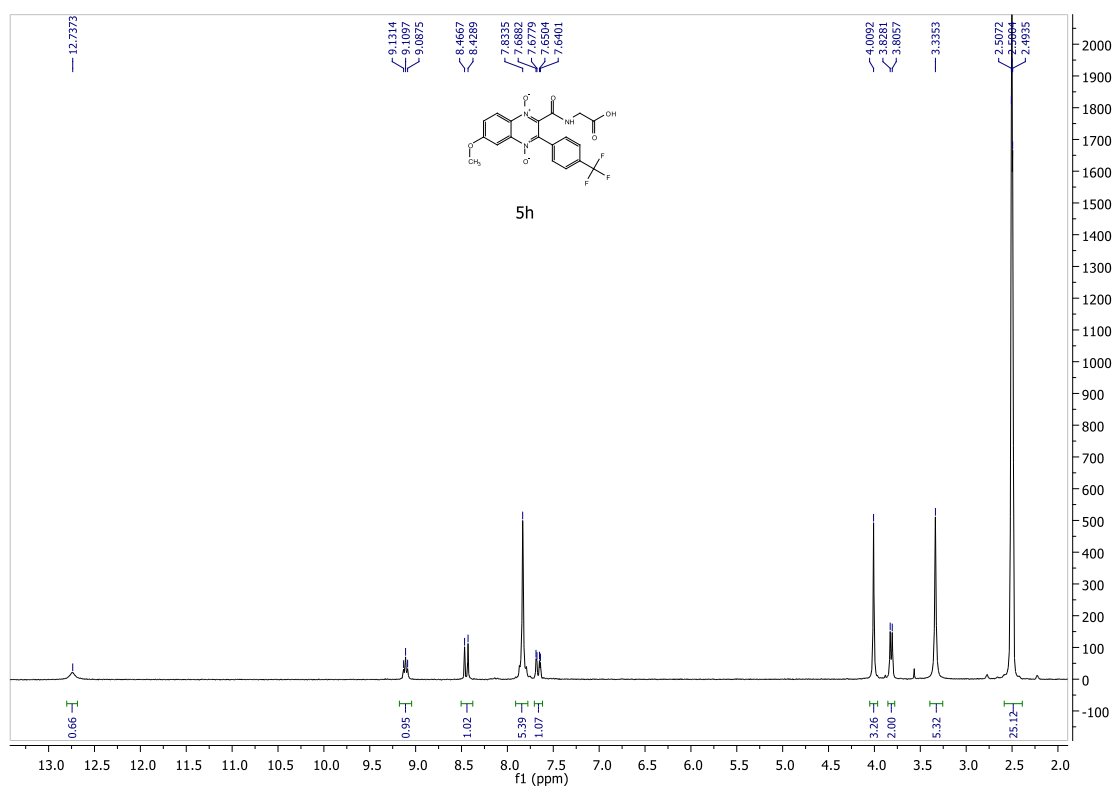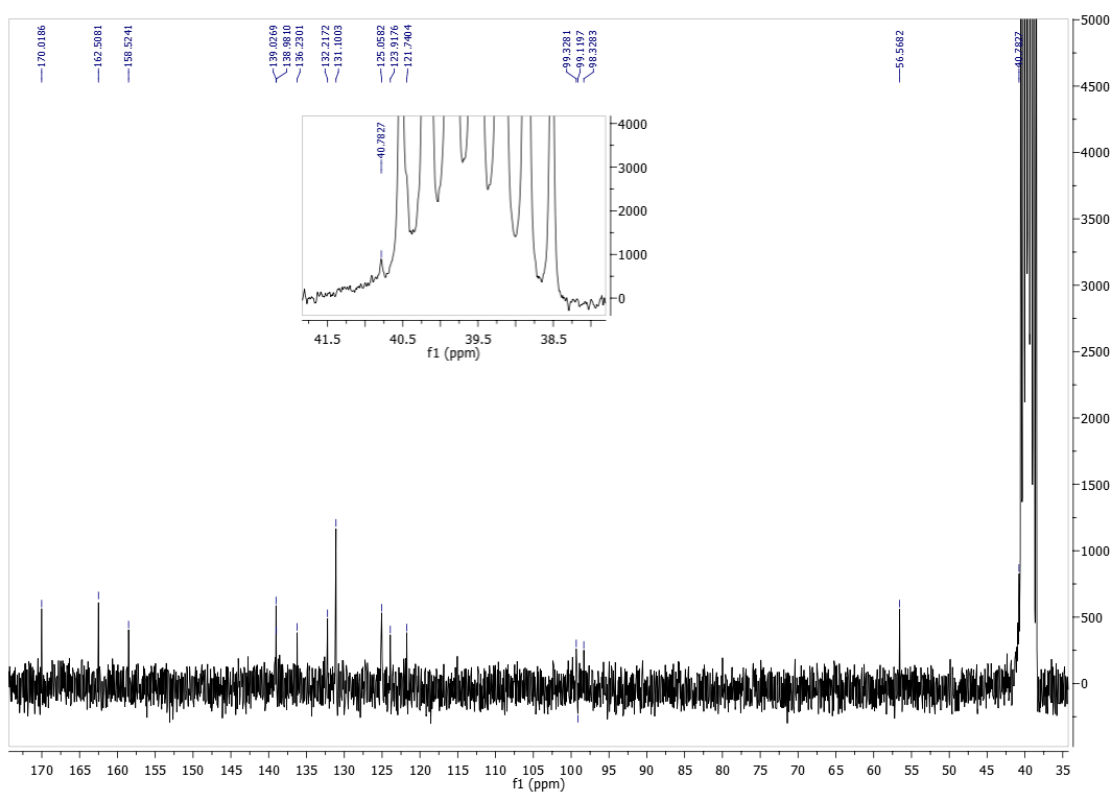

# Compound 5m

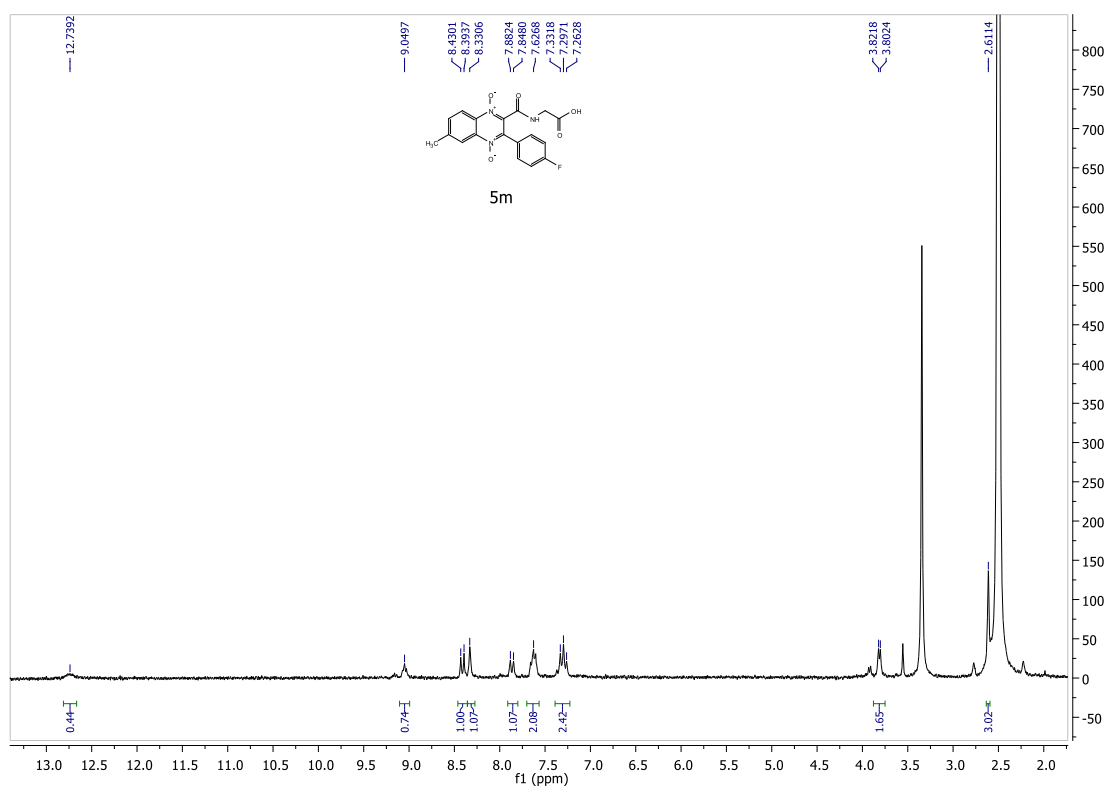



## Compound 6

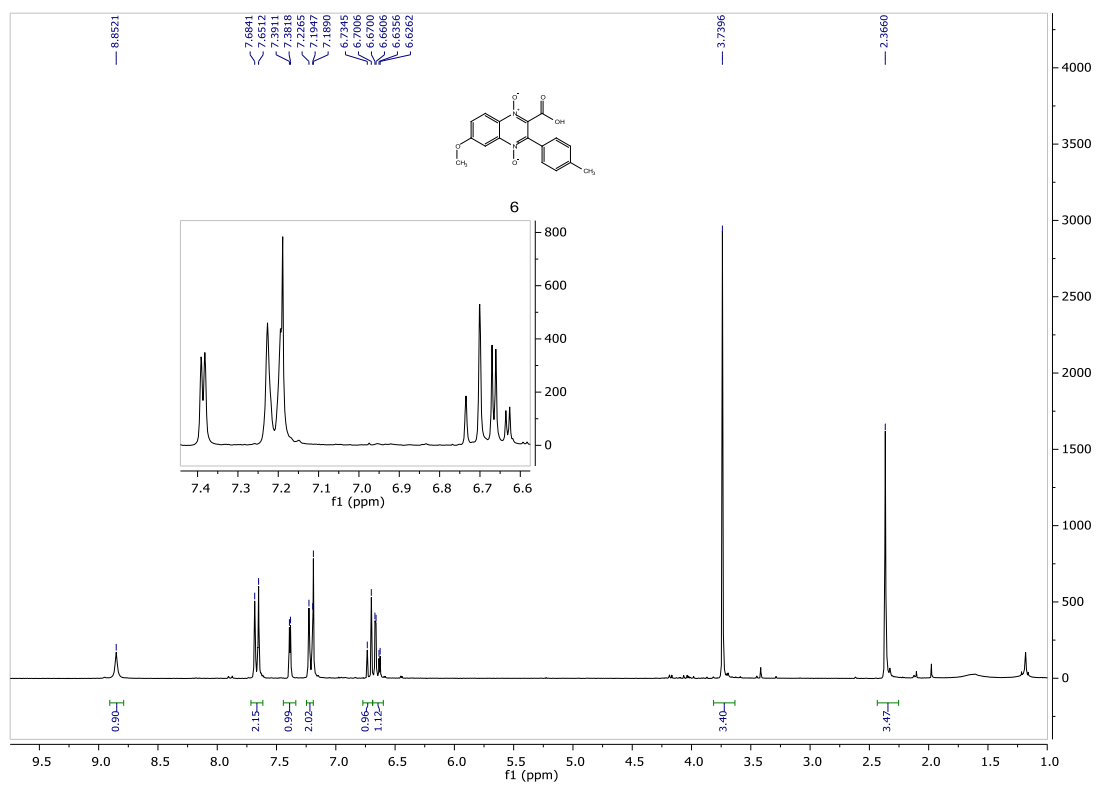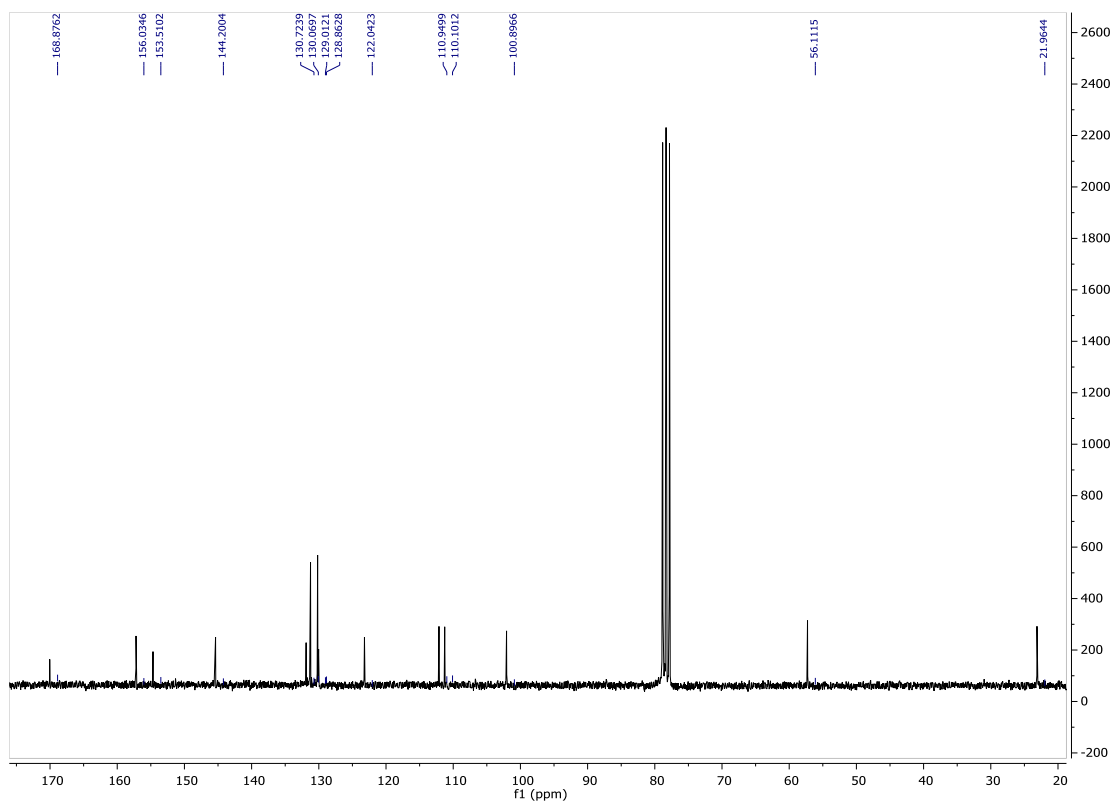

Supplement: s1 [file s1]
